# Supplementary material
Source: publisher figshare collection journal article supplement (https://tandf.figshare.com/articles/dataset/_/4502777)
Supplement: Supplementary file 1 [file 7276616]

## SUPPLEMENTARY MATERIAL

**Isolation and characterization of 2-pyridone alkaloids and alloxazines from *Beauveria bassiana***

W.J. Andrioli<sup>a,d</sup>, A.A. Lopes<sup>a,e</sup>, B.C. Cavalcanti<sup>b</sup>, C. Pessoa<sup>b</sup>, N.P.D. Nanayakkara<sup>c</sup> and J.K. Bastos<sup>a\*</sup>

<sup>a</sup>*Faculdade de Ciências Farmacêuticas de Ribeirão Preto, Universidade de São Paulo, 14040-903, Ribeirão Preto, SP, Brazil;*

<sup>b</sup>*Departamento de Fisiologia e de Farmacologia, Universidade Federal do Ceará, 3157, 60430-270, Fortaleza, CE, Brazil;*

<sup>c</sup>*National Center for Natural Products Research, University of Mississippi, Oxford, Mississippi 38677, United States;*

<sup>d</sup>*Laboratório de Produtos Bioativos, Universidade Federal do Rio de Janeiro, 27933-378, Macaé, RJ, Brazil;*

<sup>e</sup>*Unidade de Biotecnologia, Universidade de Ribeirão Preto, Av. Costábile Romano, 2201, 14096900, Ribeirão Preto, SP, Brazil*

\*Corresponding author. Email: jkbastos@fcfrp.usp.br.

**Abstract:** Two novel compounds bearing heterocyclic nitrogen, 2-pyridone alkaloid (**1**) and alloxazine derivative (**2**), along with the known pretenellin B (**3**), pyridovericin (**4**) and lumichrome (**5**) were isolated from a culture of the entomopathogenic fungal strain *Beauveria bassiana*. The chemical structures of 2-pyridone alkaloid and alloxazine derivative were established on the basis of the interpretation of spectroscopic data. The isolated compounds were evaluated in a panel of five cancer cell lines and pyridovericin exhibited cytotoxicity (IC<sub>50</sub>,  $\mu$ M) against cancer cell lines: HL-60 ( $25.9 \pm 0.3$ ), HCT8 ( $34.6 \pm 3.6$ ), MDA-MB435 ( $34.8 \pm 3.8$ ) and SF295 ( $31.1 \pm 0.6$ ). Considering that other pyridone compounds display good cytotoxic activity, it would be suggested to obtain new semi synthetic derivatives of pyridovericin, for the development of new cytotoxic chemical entities.

**Keywords:** Alloxazines, *Beauveria bassiana*, entomopathogenic fungus, pyridone alkaloids

## Table of contents

|                                                                                       | <b>Page</b> |
|---------------------------------------------------------------------------------------|-------------|
| Figure S1. <sup>1</sup> H NMR (500 MHz, DMSO) spectrum of the new compound <b>1</b>   | S3          |
| Figure S2. NOESY 1D NMR spectrum of the new compound <b>1</b> in DMSO                 | S4          |
| Figure S3. TOCSY 1D NMR spectrum of the new compound <b>1</b> in DMSO                 | S5          |
| Figure S4. <sup>13</sup> C NMR (125 MHz, DMSO) spectrum of the new compound <b>1</b>  | S6          |
| Figure S5. COSY NMR spectrum of the new compound <b>1</b> in DMSO                     | S7          |
| Figure S6. HMQC NMR spectrum of the new compound <b>1</b> in DMSO                     | S8          |
| Figure S7. HMBC NMR spectrum of the new compound <b>1</b> in DMSO                     | S9          |
| Figure S8. Mass spectra by HRMS (MS/MS) of <b>1</b> .                                 | S10         |
| Figure S9. Mass spectra by HRMS of <b>1</b> .                                         | S11         |
| Figure S10. <sup>1</sup> H NMR (500 MHz, DMSO) spectrum of the new compound <b>2</b>  | S12         |
| Figure S11. <sup>13</sup> C NMR (125 MHz, DMSO) spectrum of the new compound <b>2</b> | S13         |
| Figure S12. DEPT NMR spectrum of the new compound <b>2</b> in DMSO                    | S14         |
| Figure S13. COSY NMR spectrum of the new compound <b>2</b> in DMSO                    | S15         |
| Figure S14. HMQC NMR spectrum of the new compound <b>2</b> in DMSO                    | S16         |
| Figure S15. HMBC NMR spectrum of the new compound <b>2</b> in DMSO                    | S17         |
| Figure S16. Mass spectra of <b>2</b>                                                  | S18         |
| Spectral data of new compounds                                                        | S19         |
| Table S1. NMR Spectroscopic data (500 MHz) for alkaloid <b>1</b>                      | S20         |
| Table S2. NMR Spectroscopic data (500 MHz) for compound <b>2</b>                      | S21         |
| Spectral data of known compounds                                                      | S22         |
| Figure S17. Graphics of cytotoxicity assay                                            | S23         |

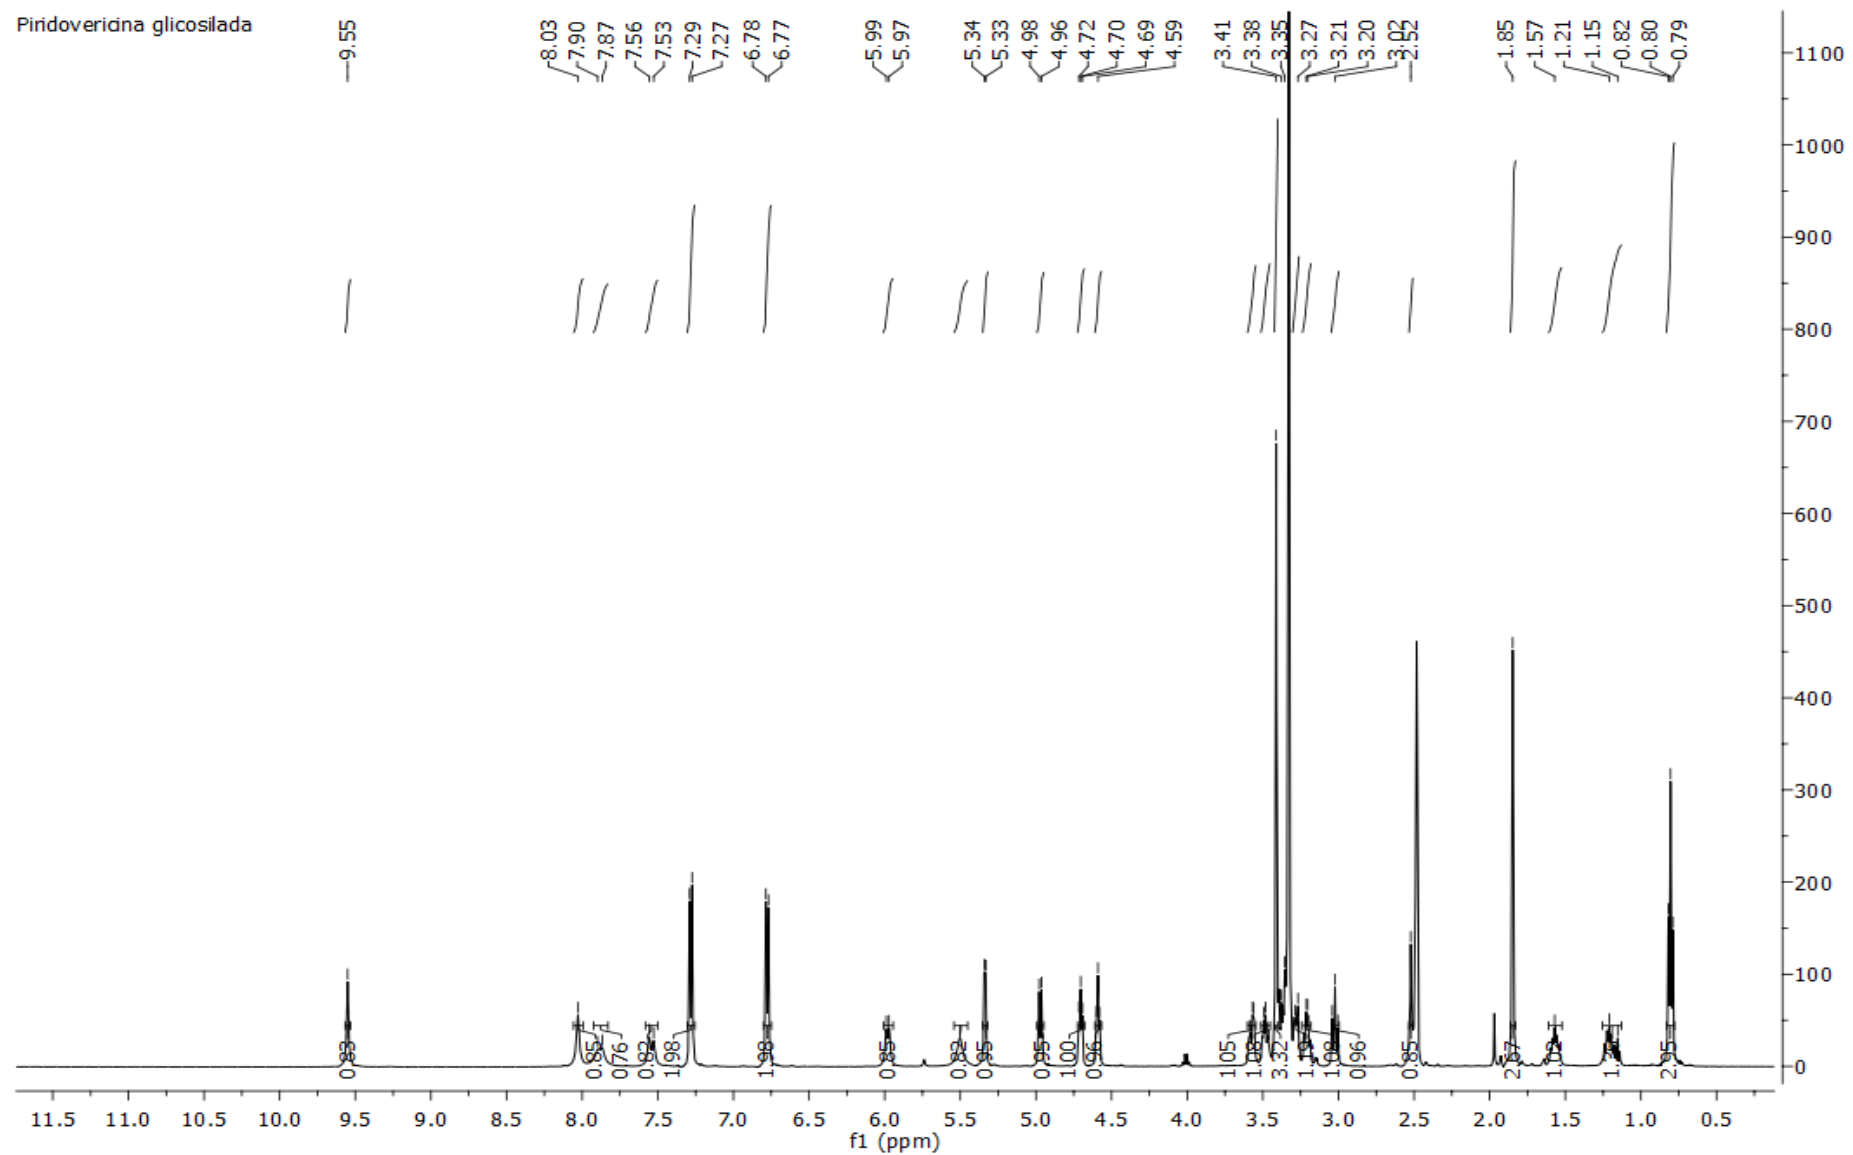

**Figure S1.**  $^1\text{H}$  NMR (500 MHz, DMSO) spectrum of the new compound **1**

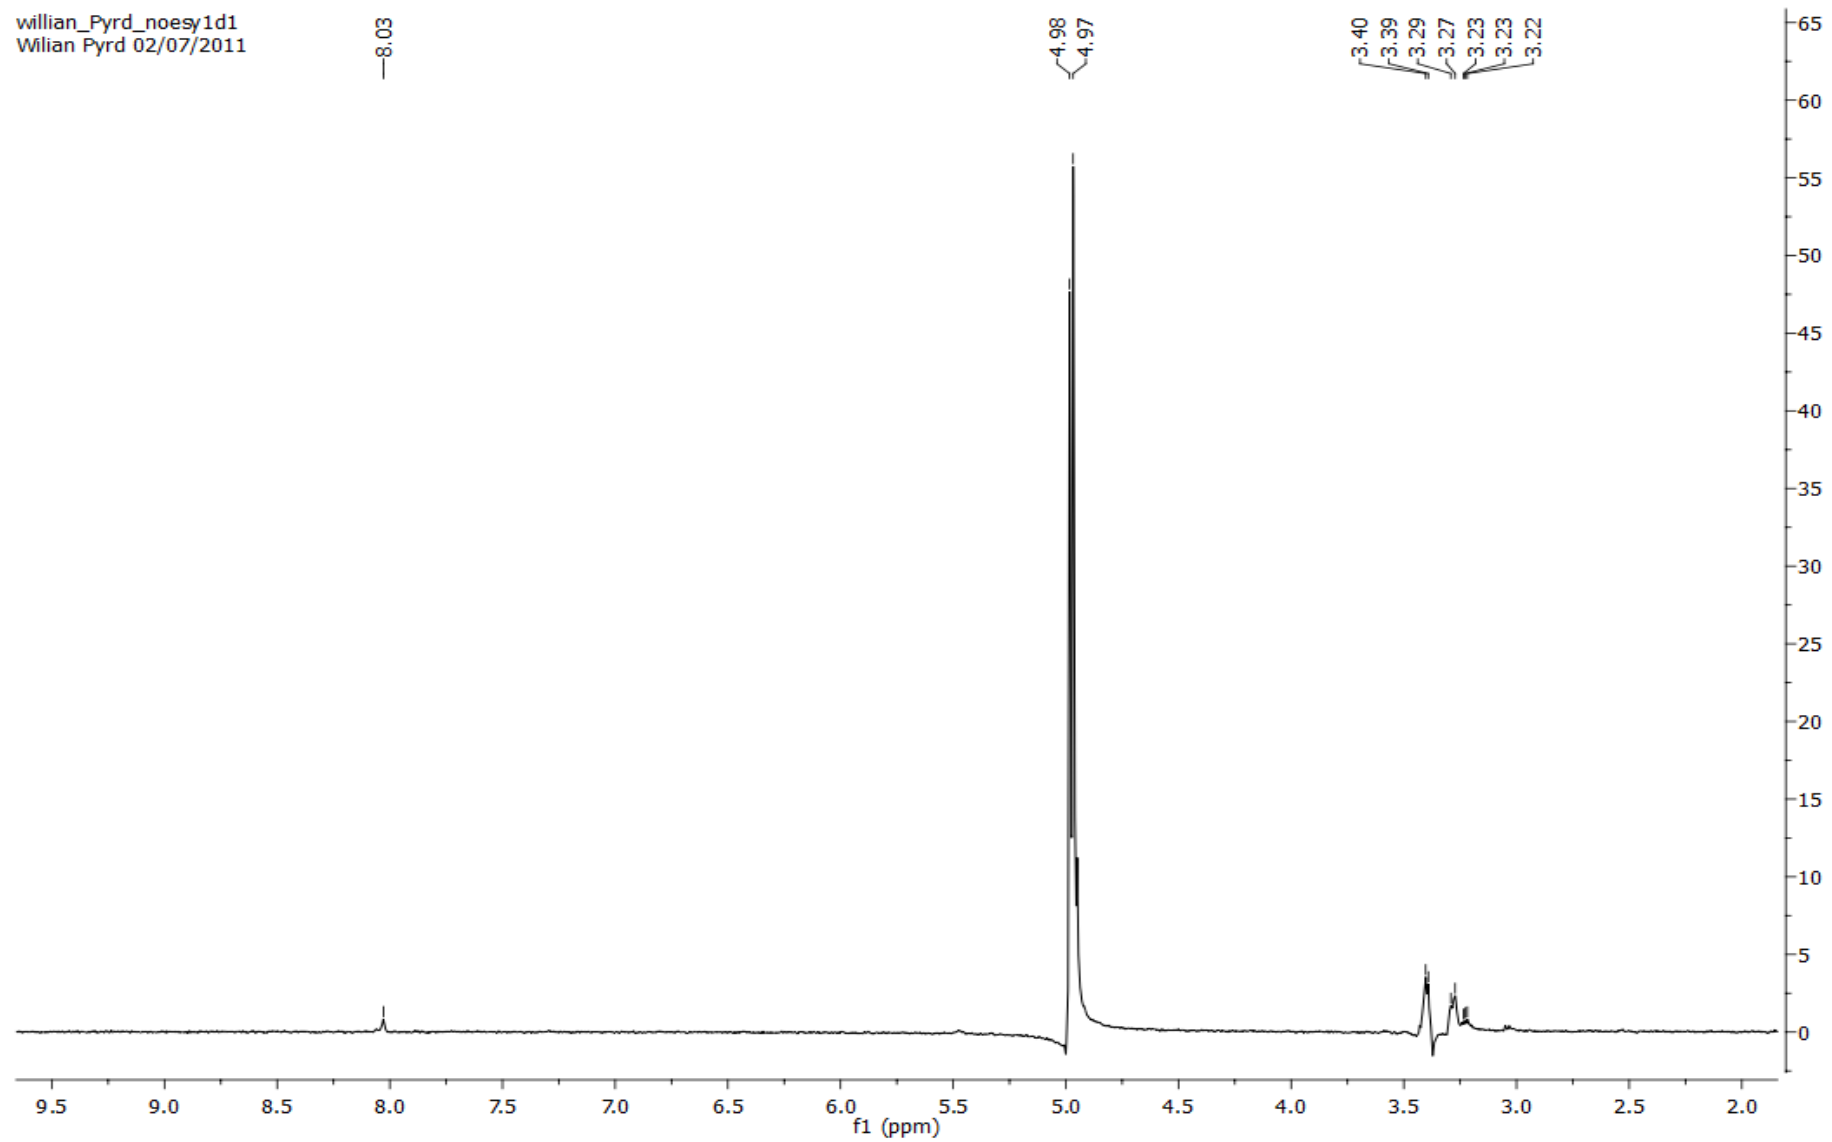

**Figure S2.** NOESY 1D NMR spectrum of the new compound **1** in DMSO.

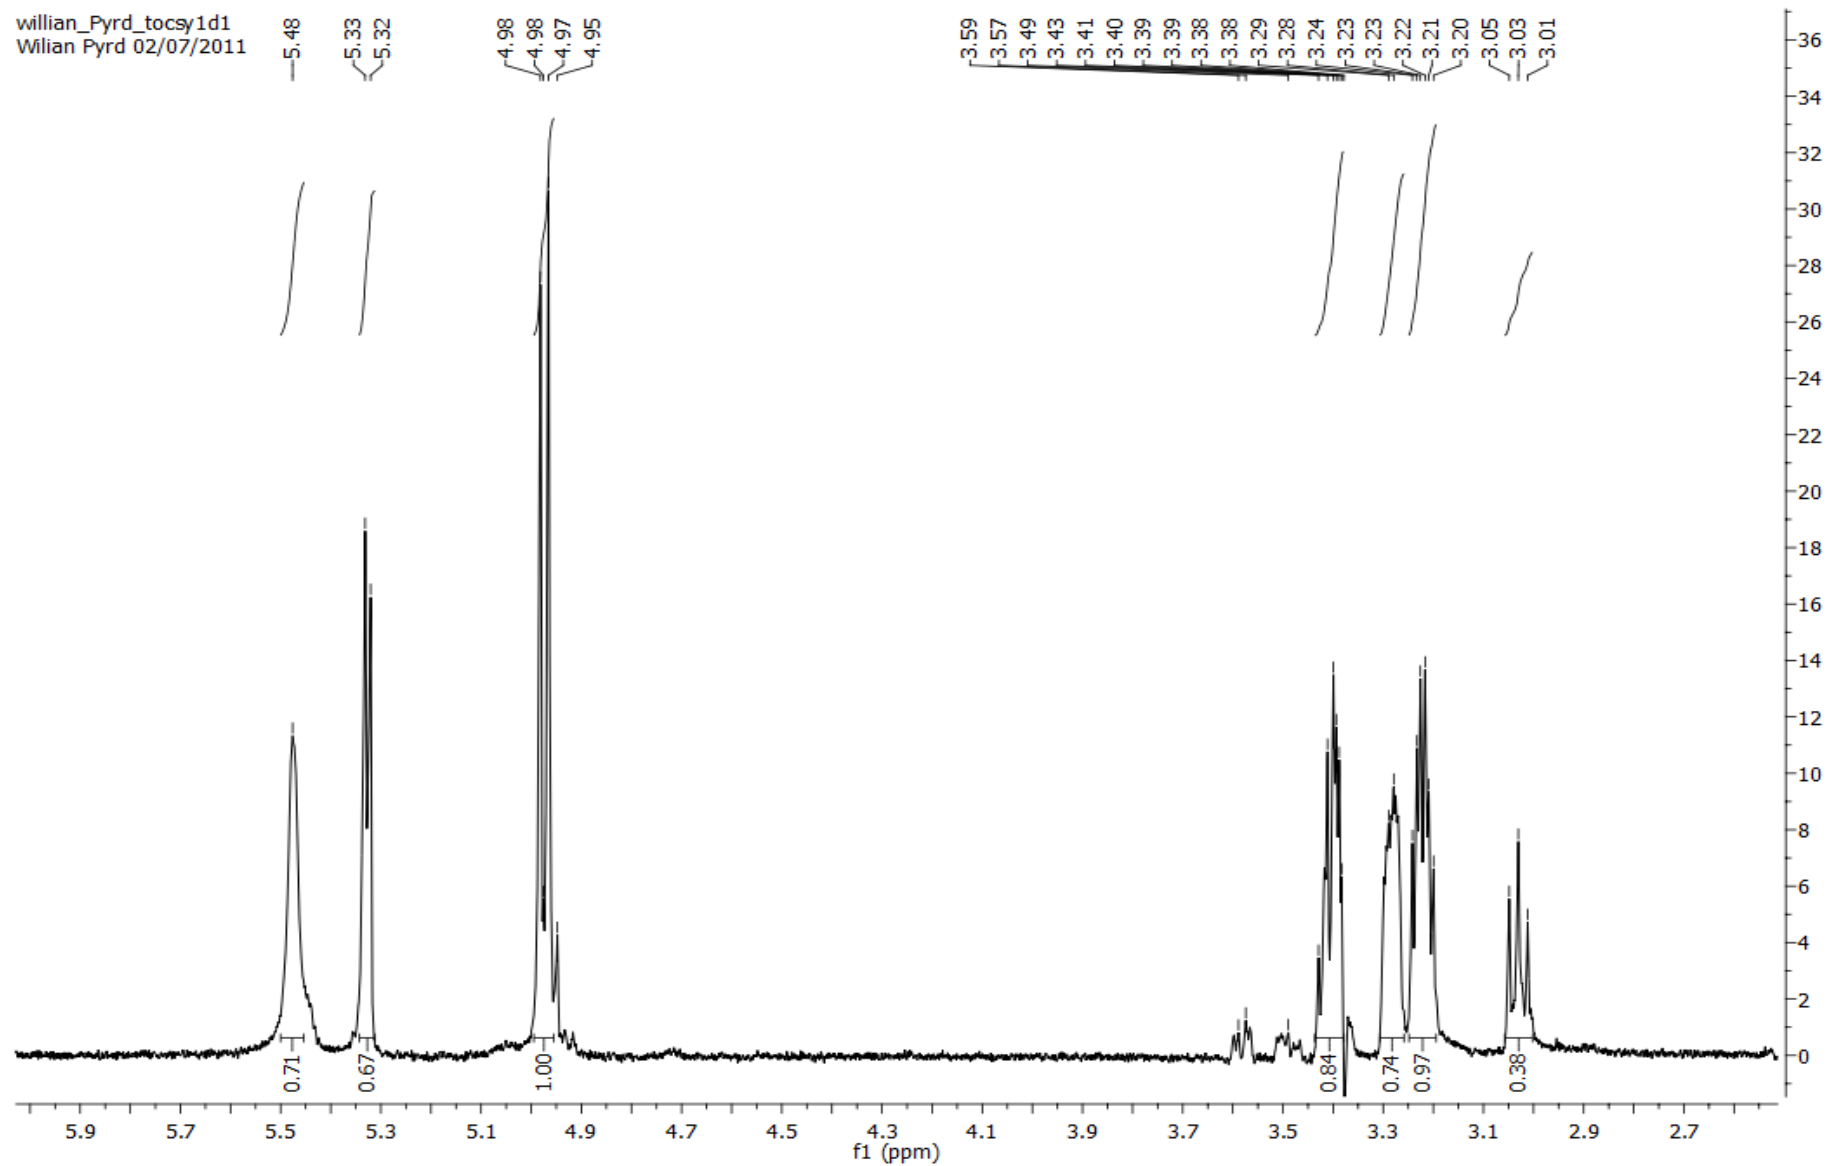

**Figure S3.** TOCSY 1D spectrum of the new compound **1** in DMSO.

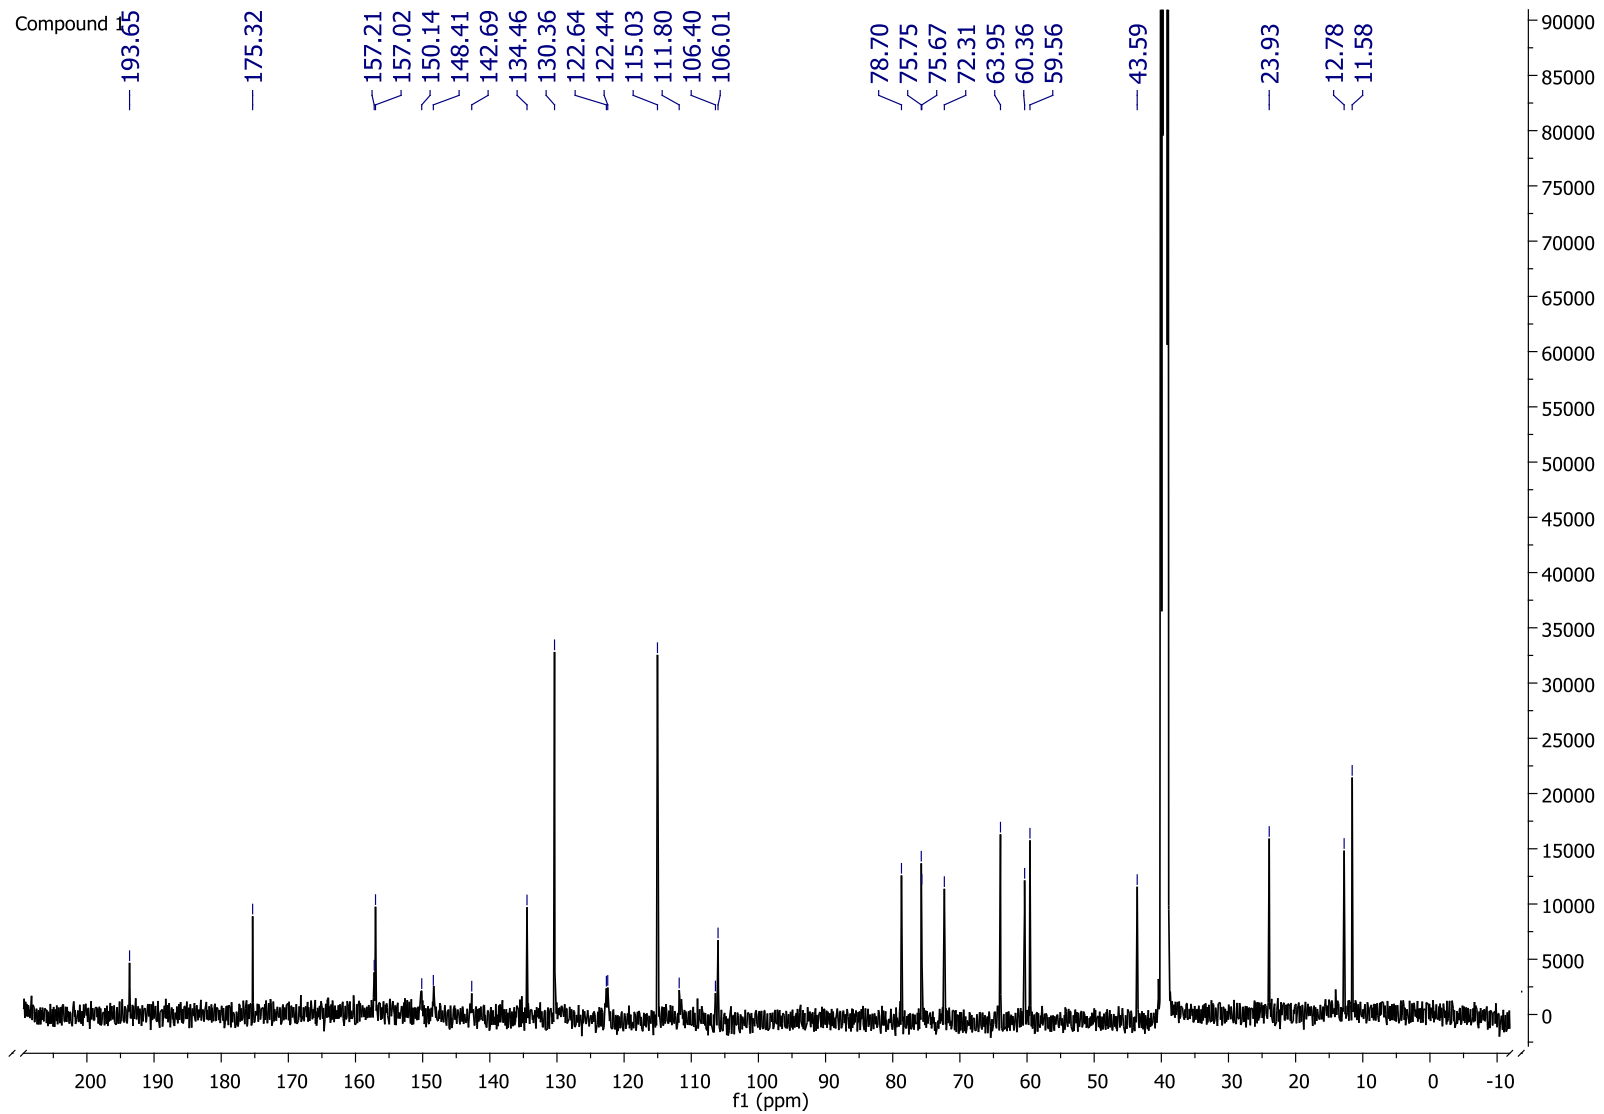

**Figure S4.**  $^{13}\text{C}$  NMR (125 MHz, DMSO) spectrum of the new compound **1**.

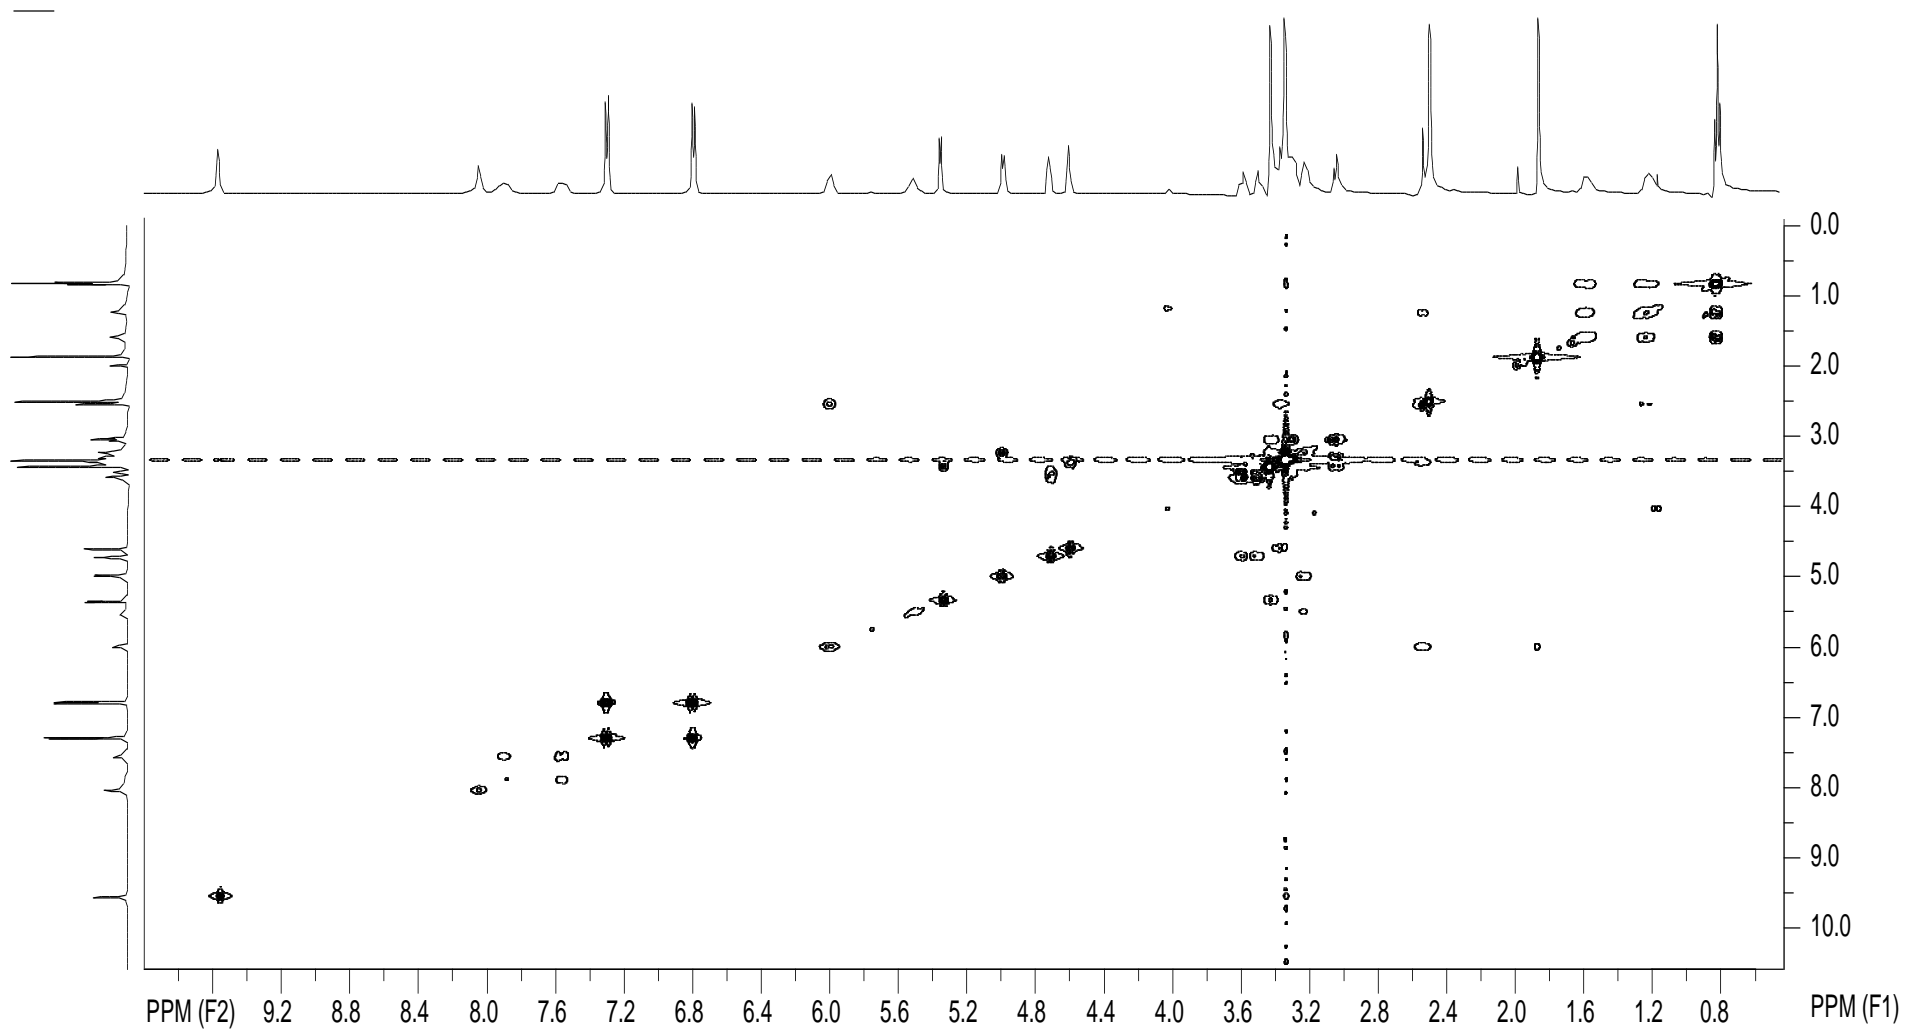

**Figure S5.** COSY NMR spectrum of the new compound **1** in DMSO.

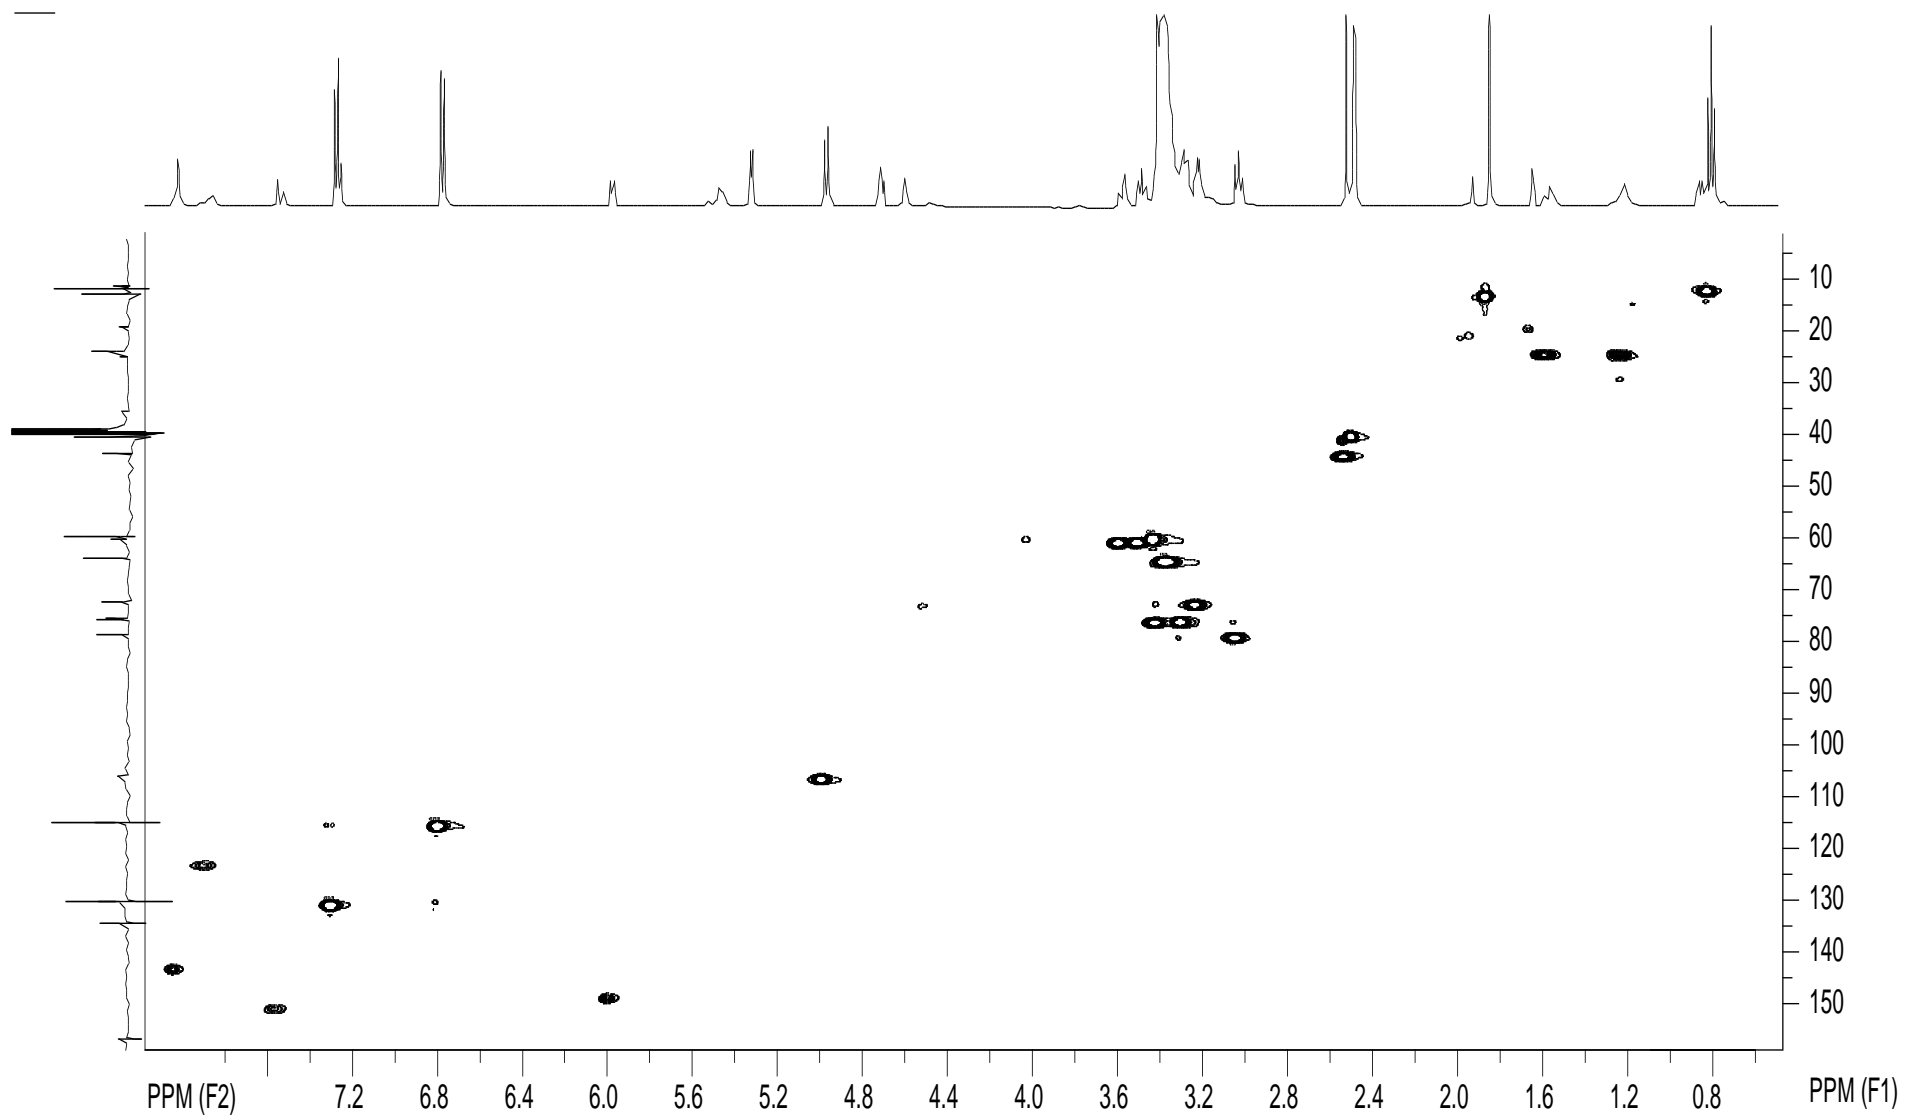

**Figure S6.** HMQC NMR spectrum of the new compound **1** in DMSO.



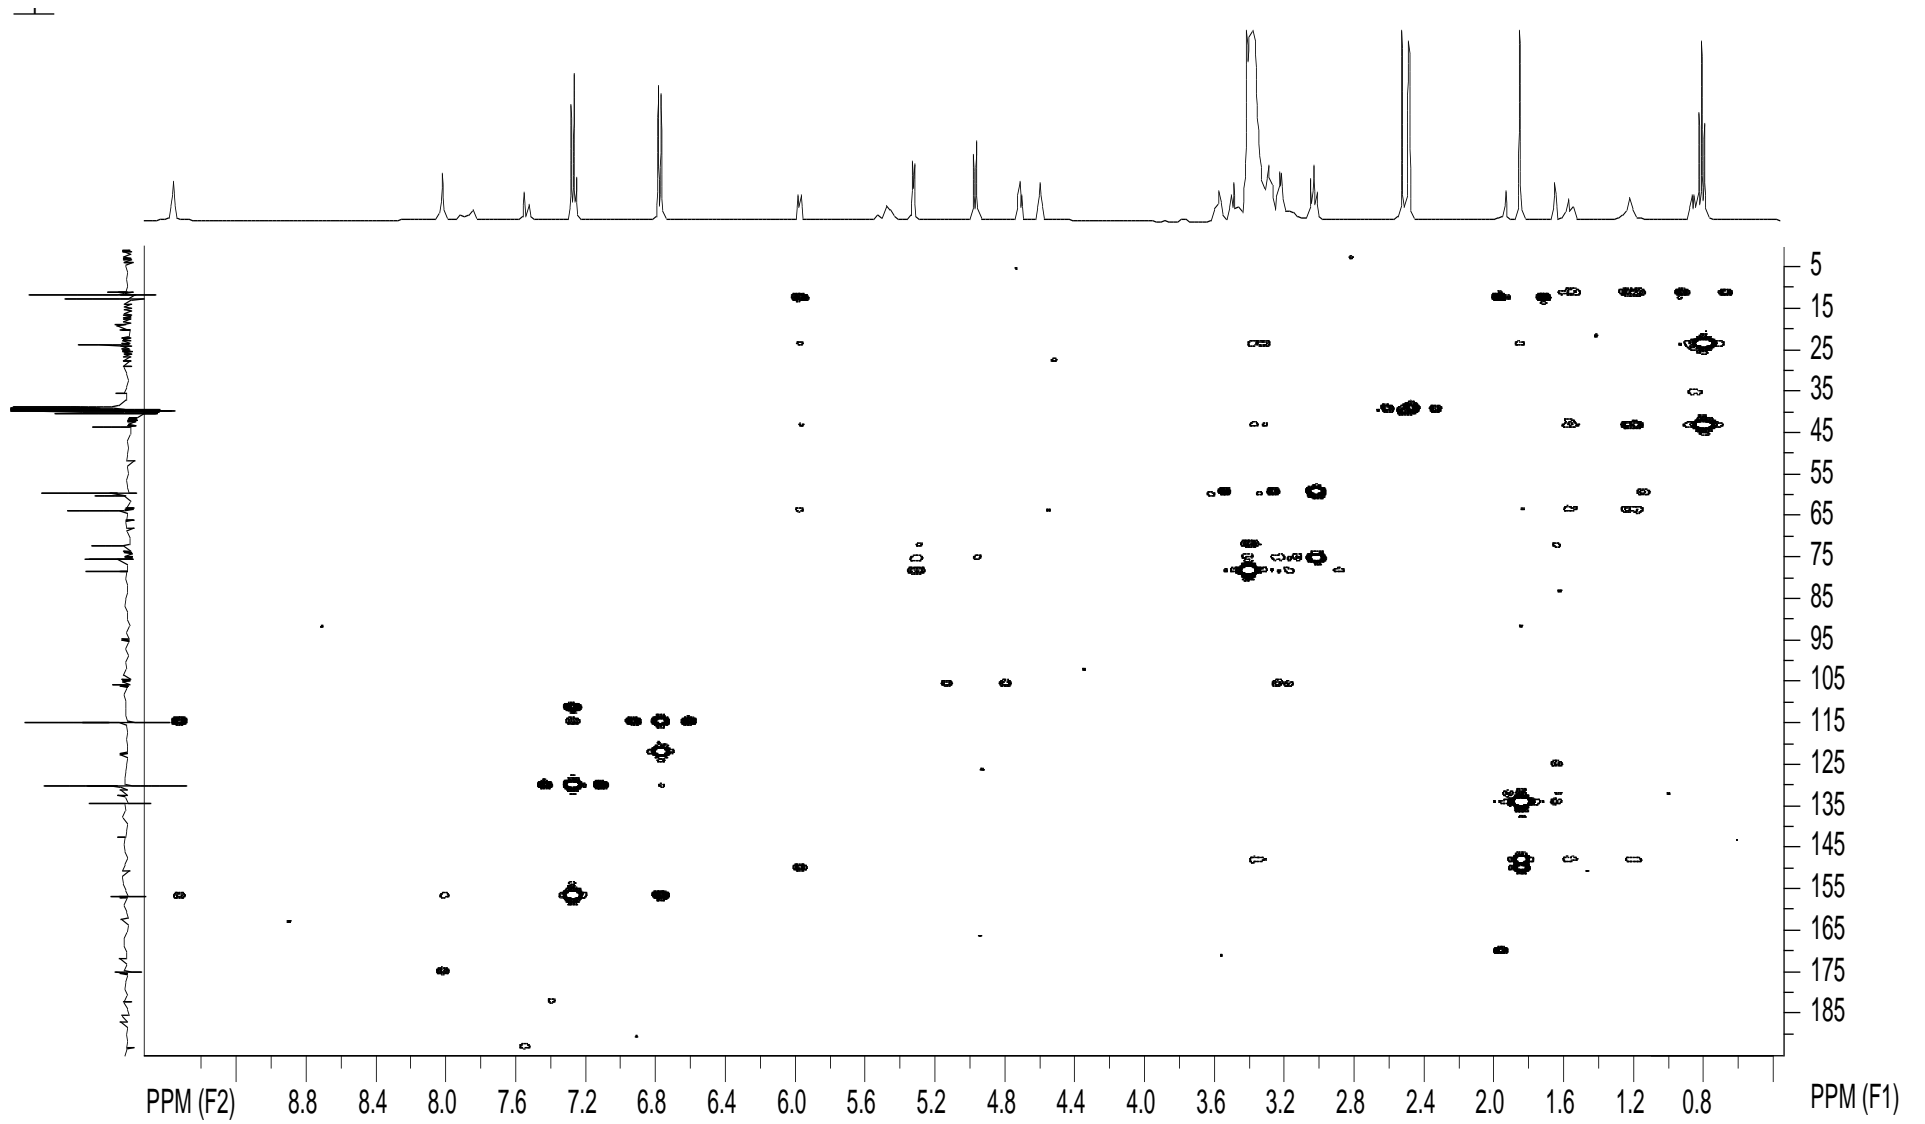

**Figure S7.** HMBC NMR spectrum of the new compound **1** in DMSO.

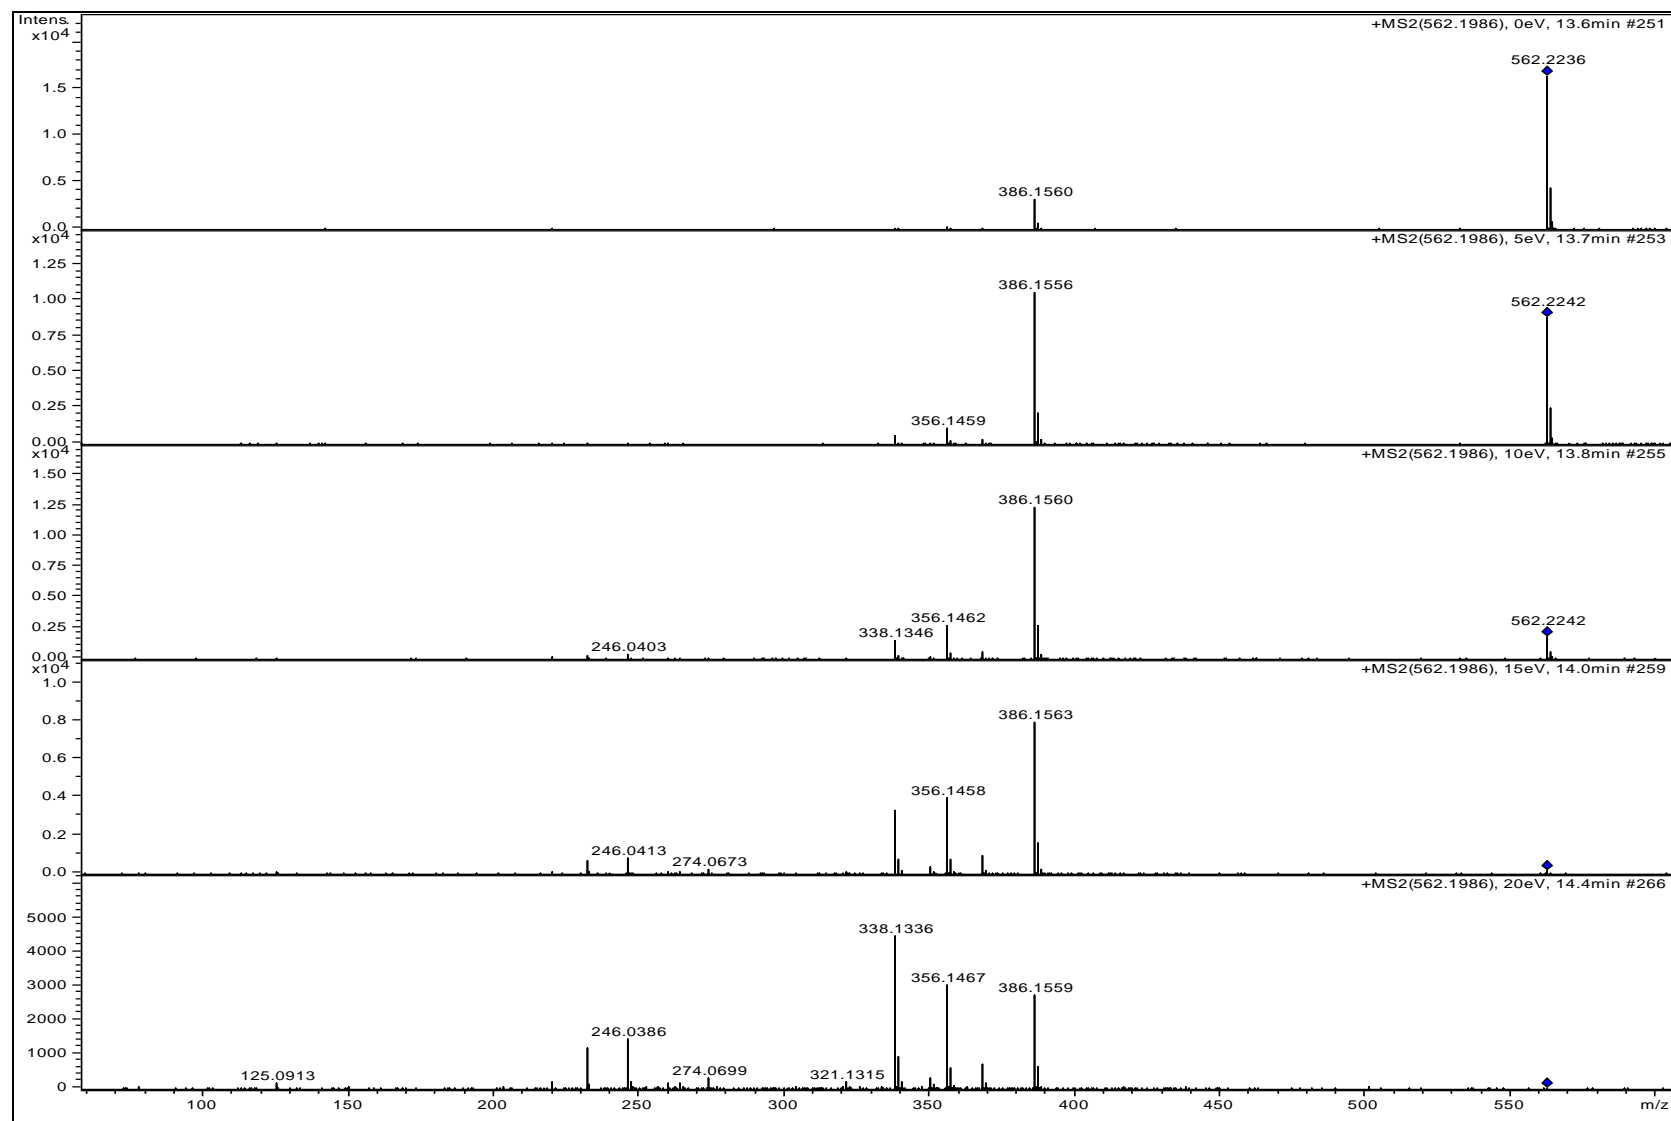

Figure S8. Mass spectra by HRMS of 1.

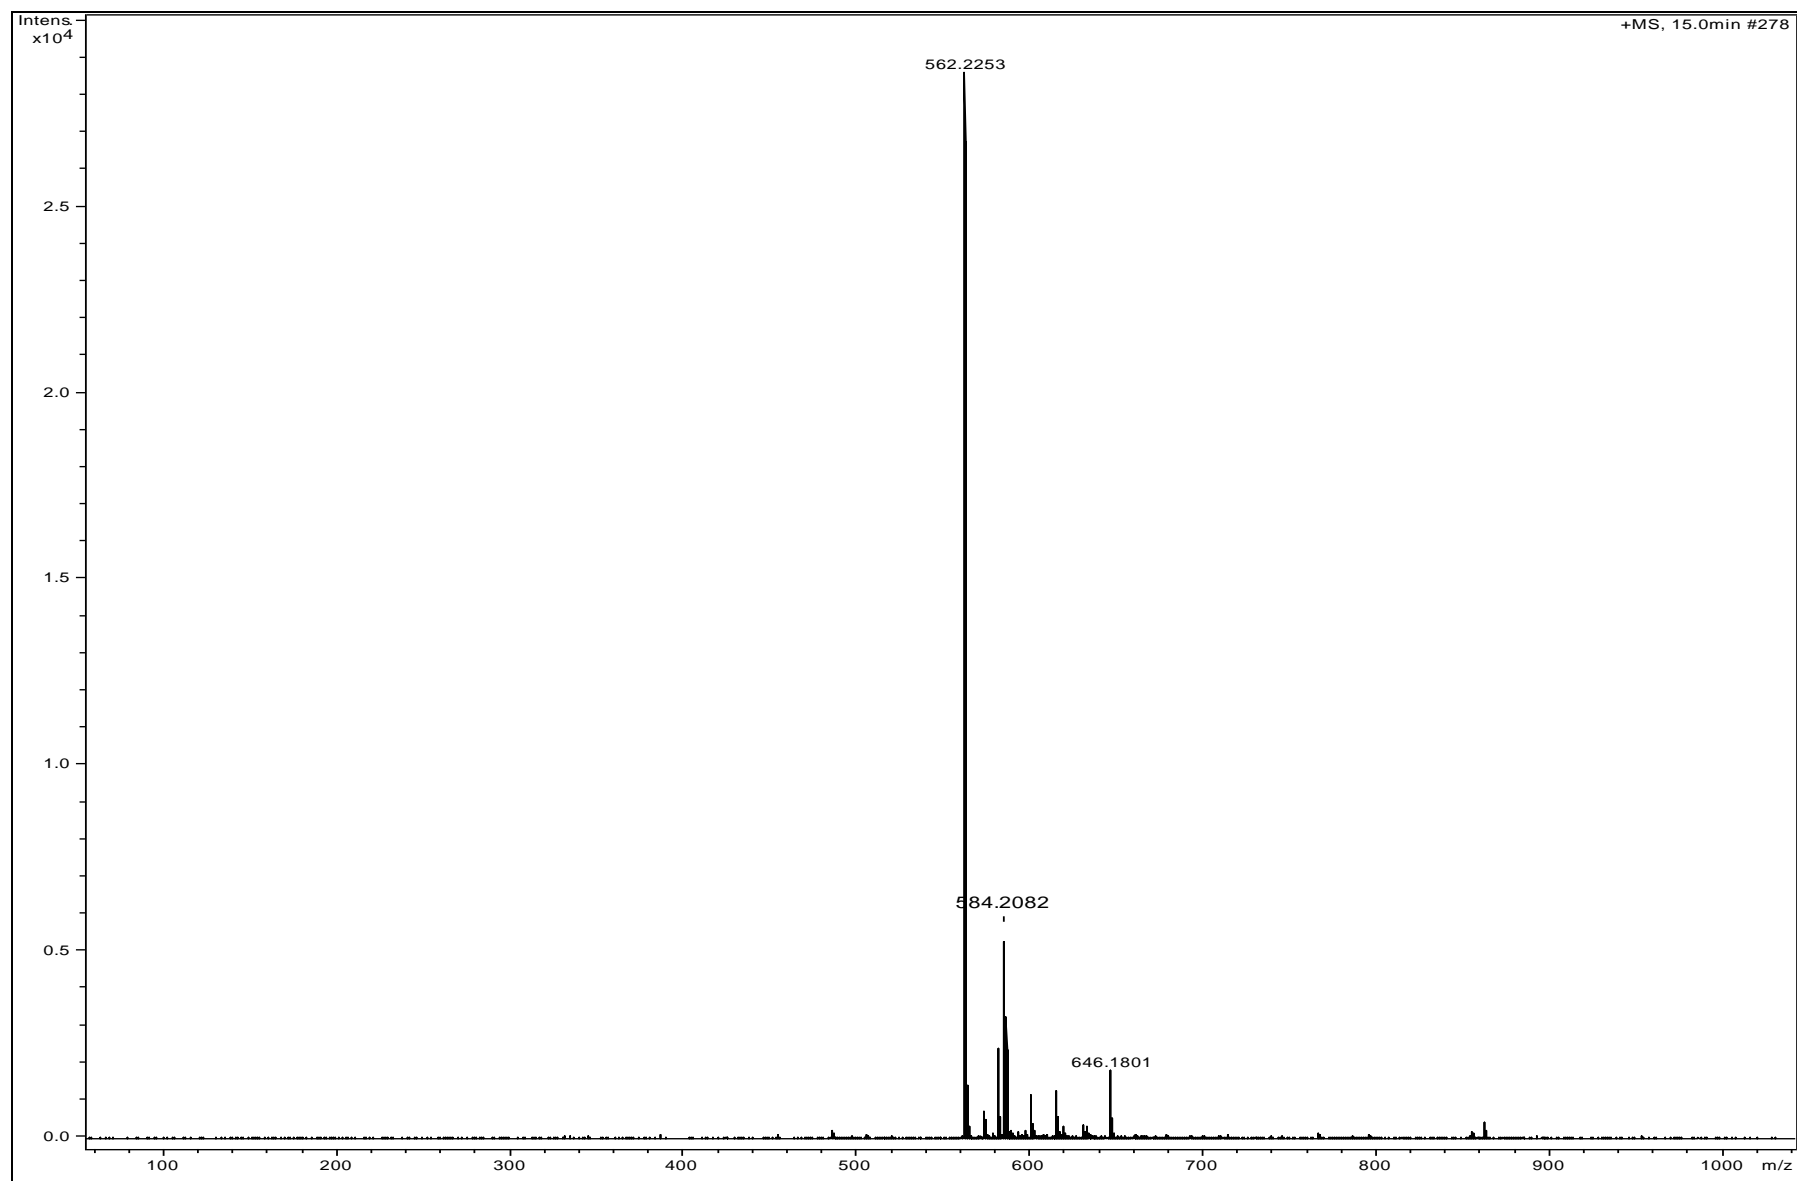

Figure S9. Mass spectra by HRMS of 1.

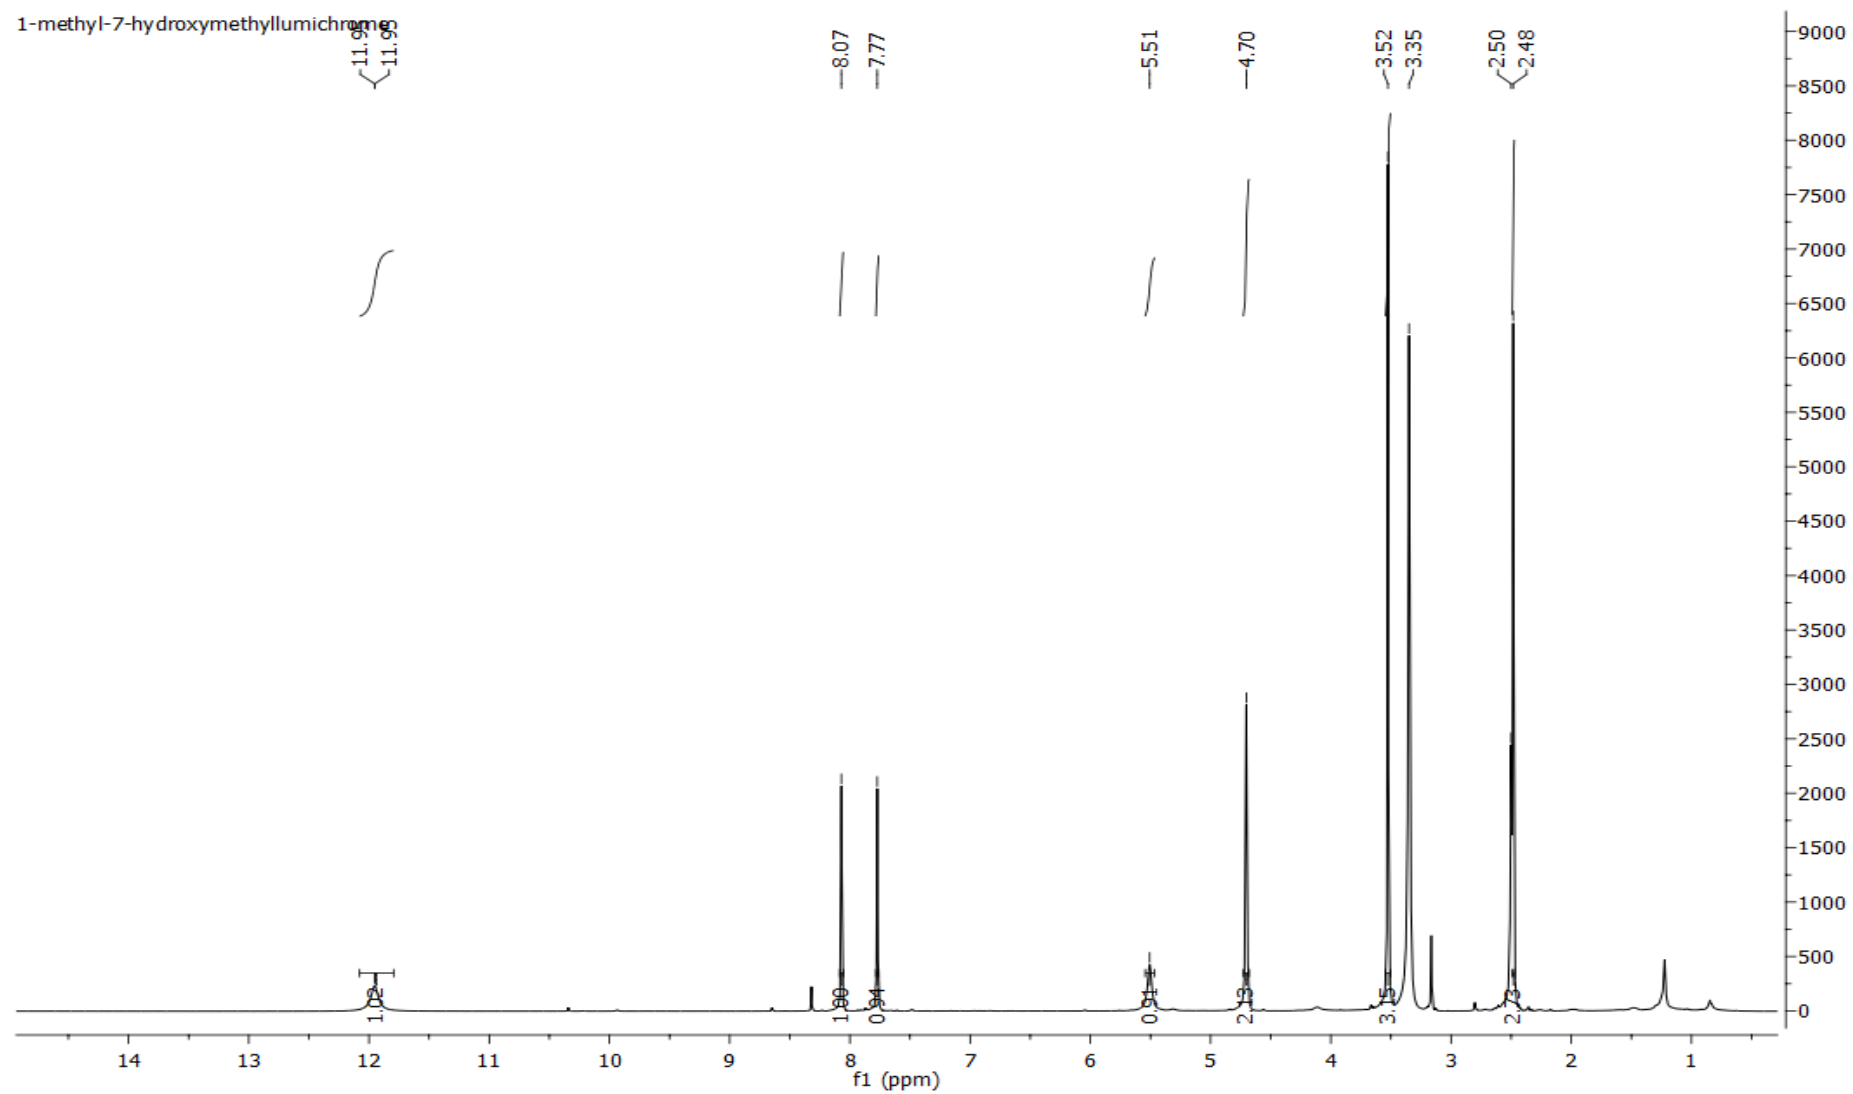

**Figure S10.**  $^1\text{H}$  NMR (500 MHz, DMSO) spectrum of the new compound **2**.

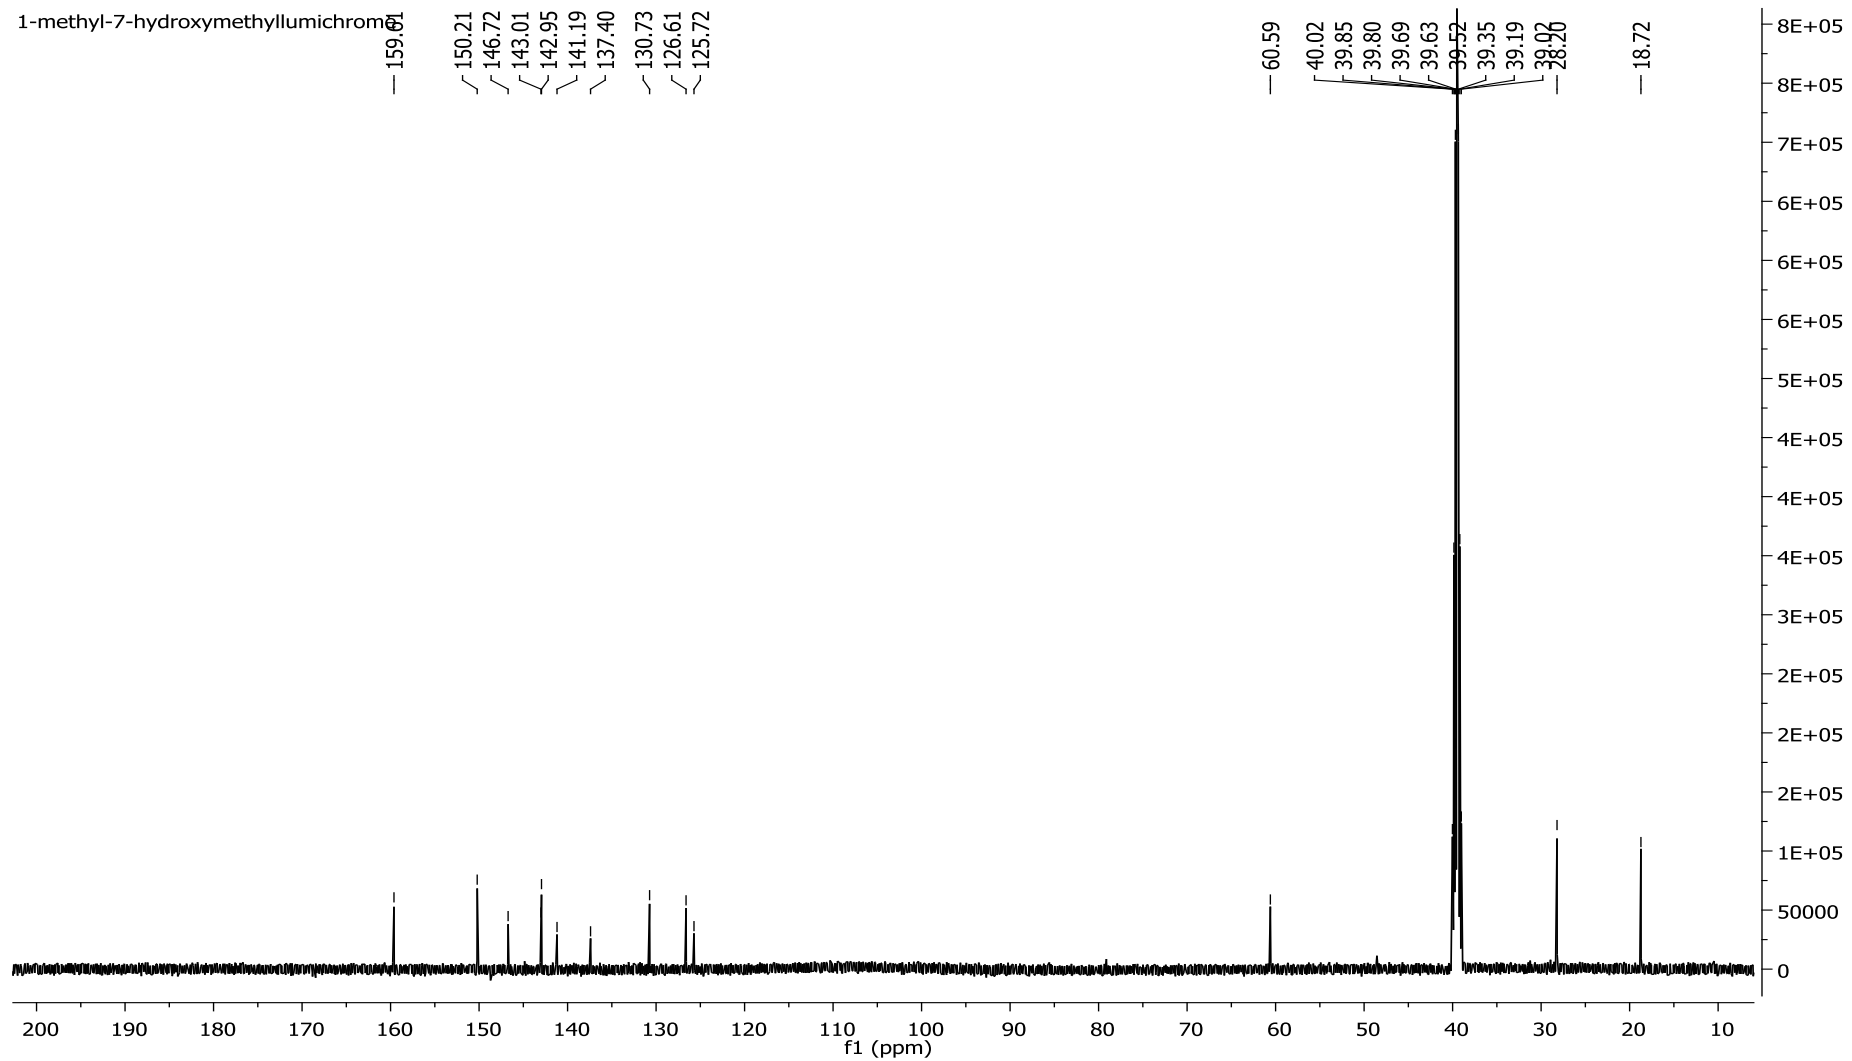

**Figure S11.**  $^{13}\text{C}$  NMR (125 MHz, DMSO) spectrum of the new compound **2**.

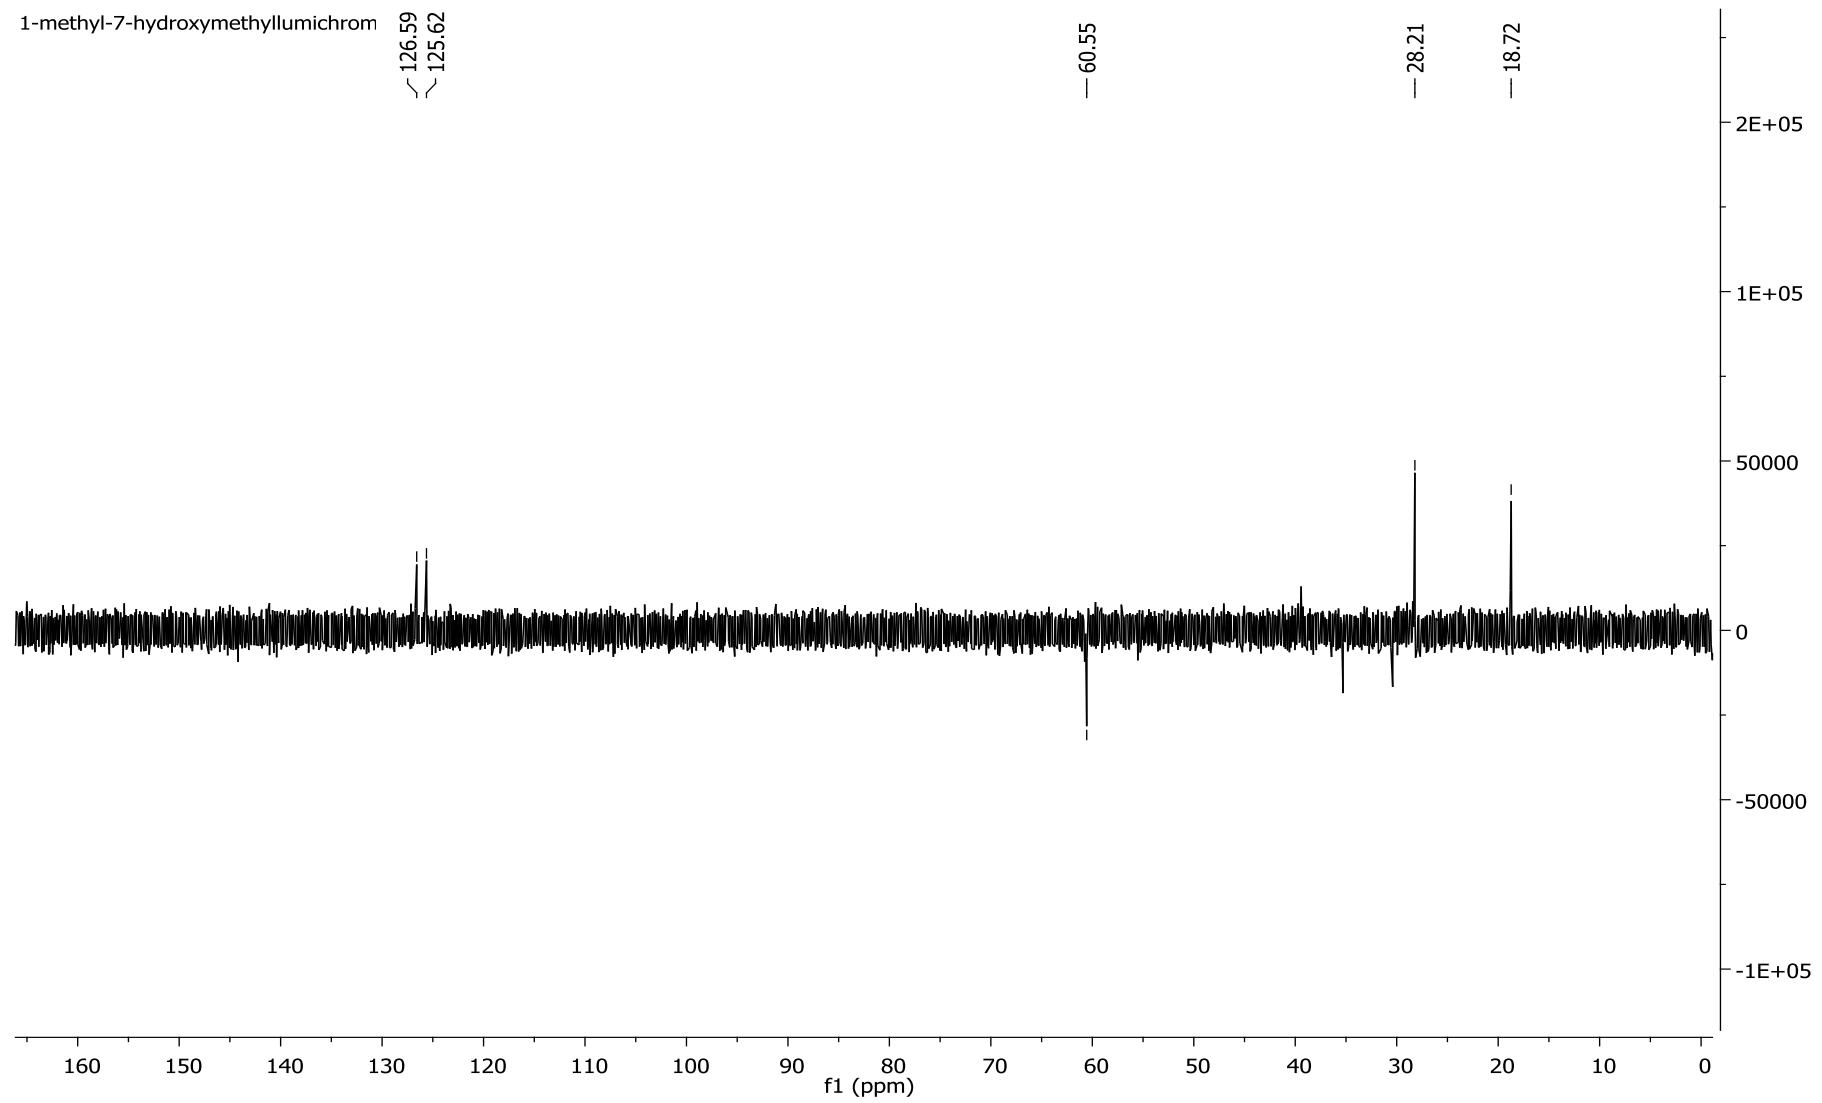

**Figure S12.** DEPT NMR spectrum of the new compound **2** in DMSO.

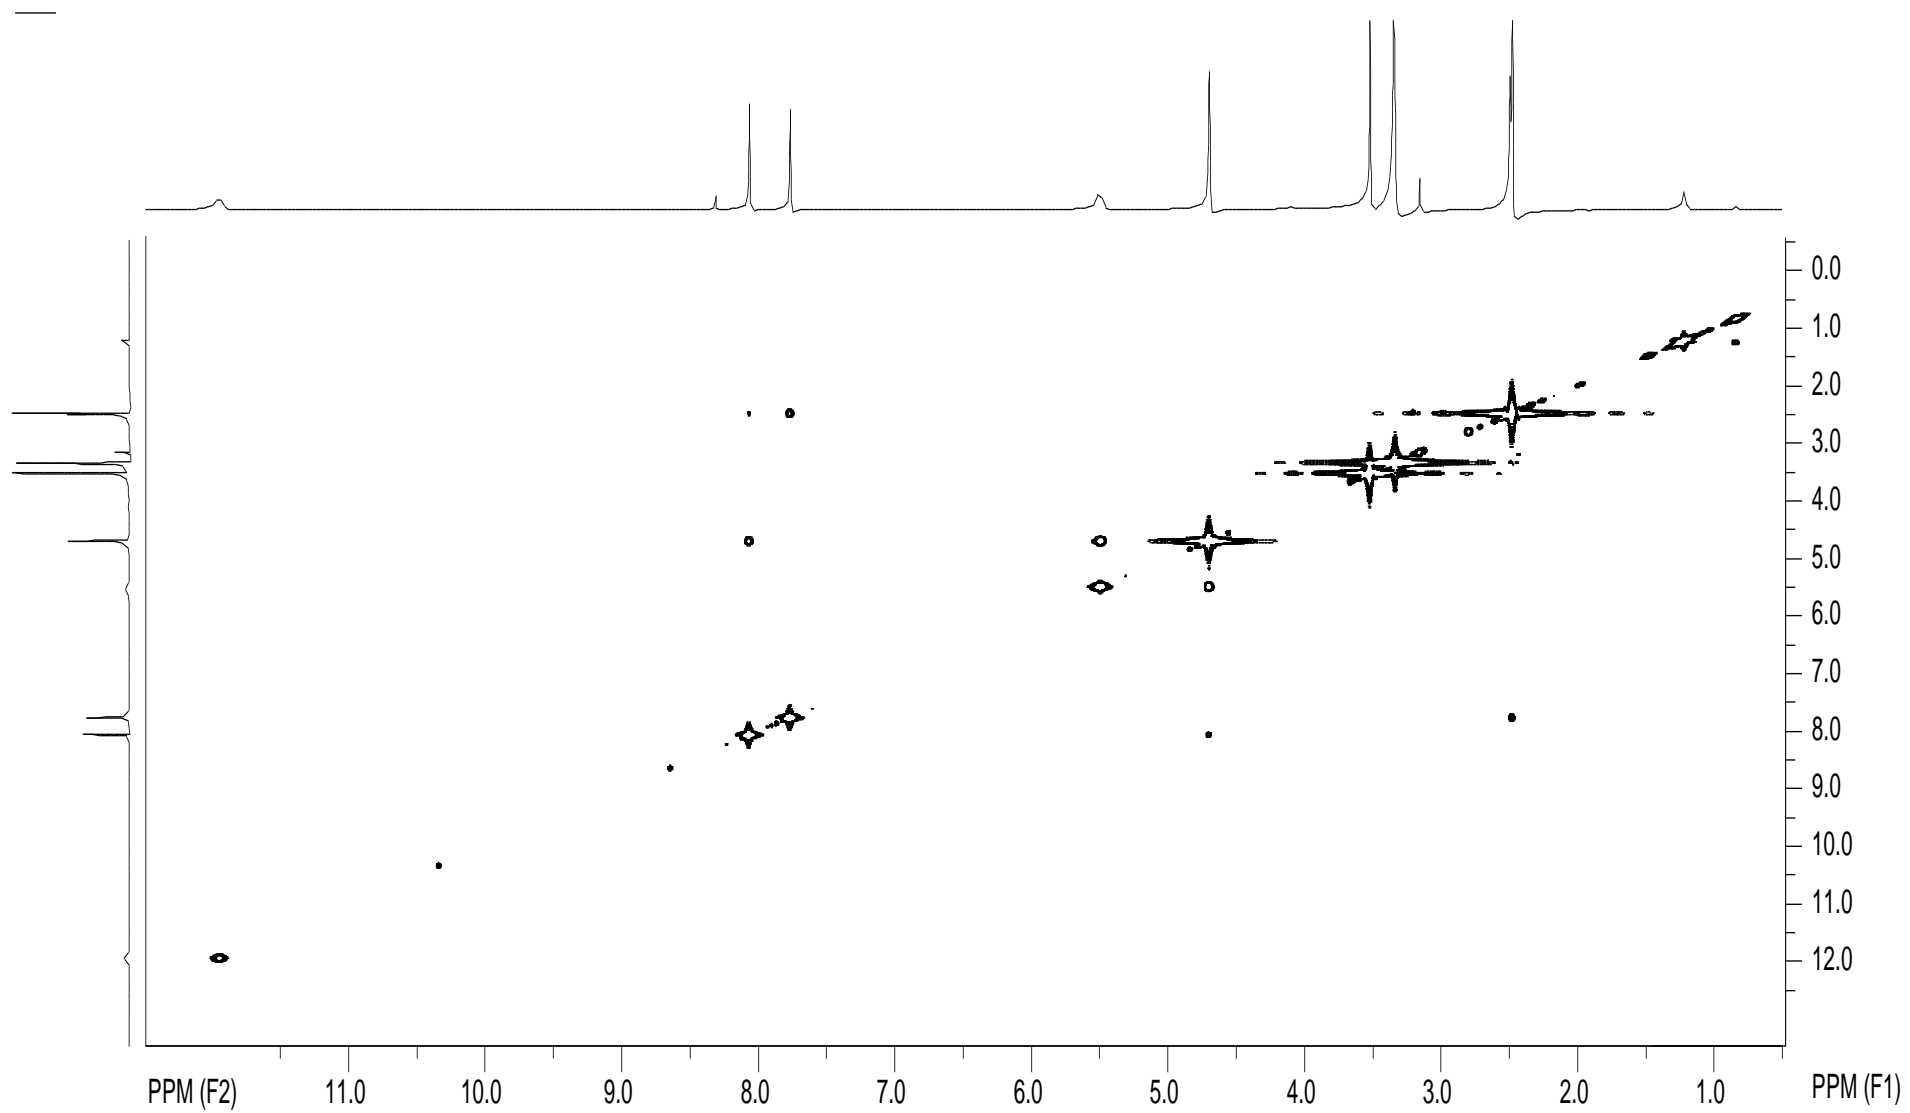

**Figura S13.** COSY NMR spectrum of the new compound **2** in DMSO.

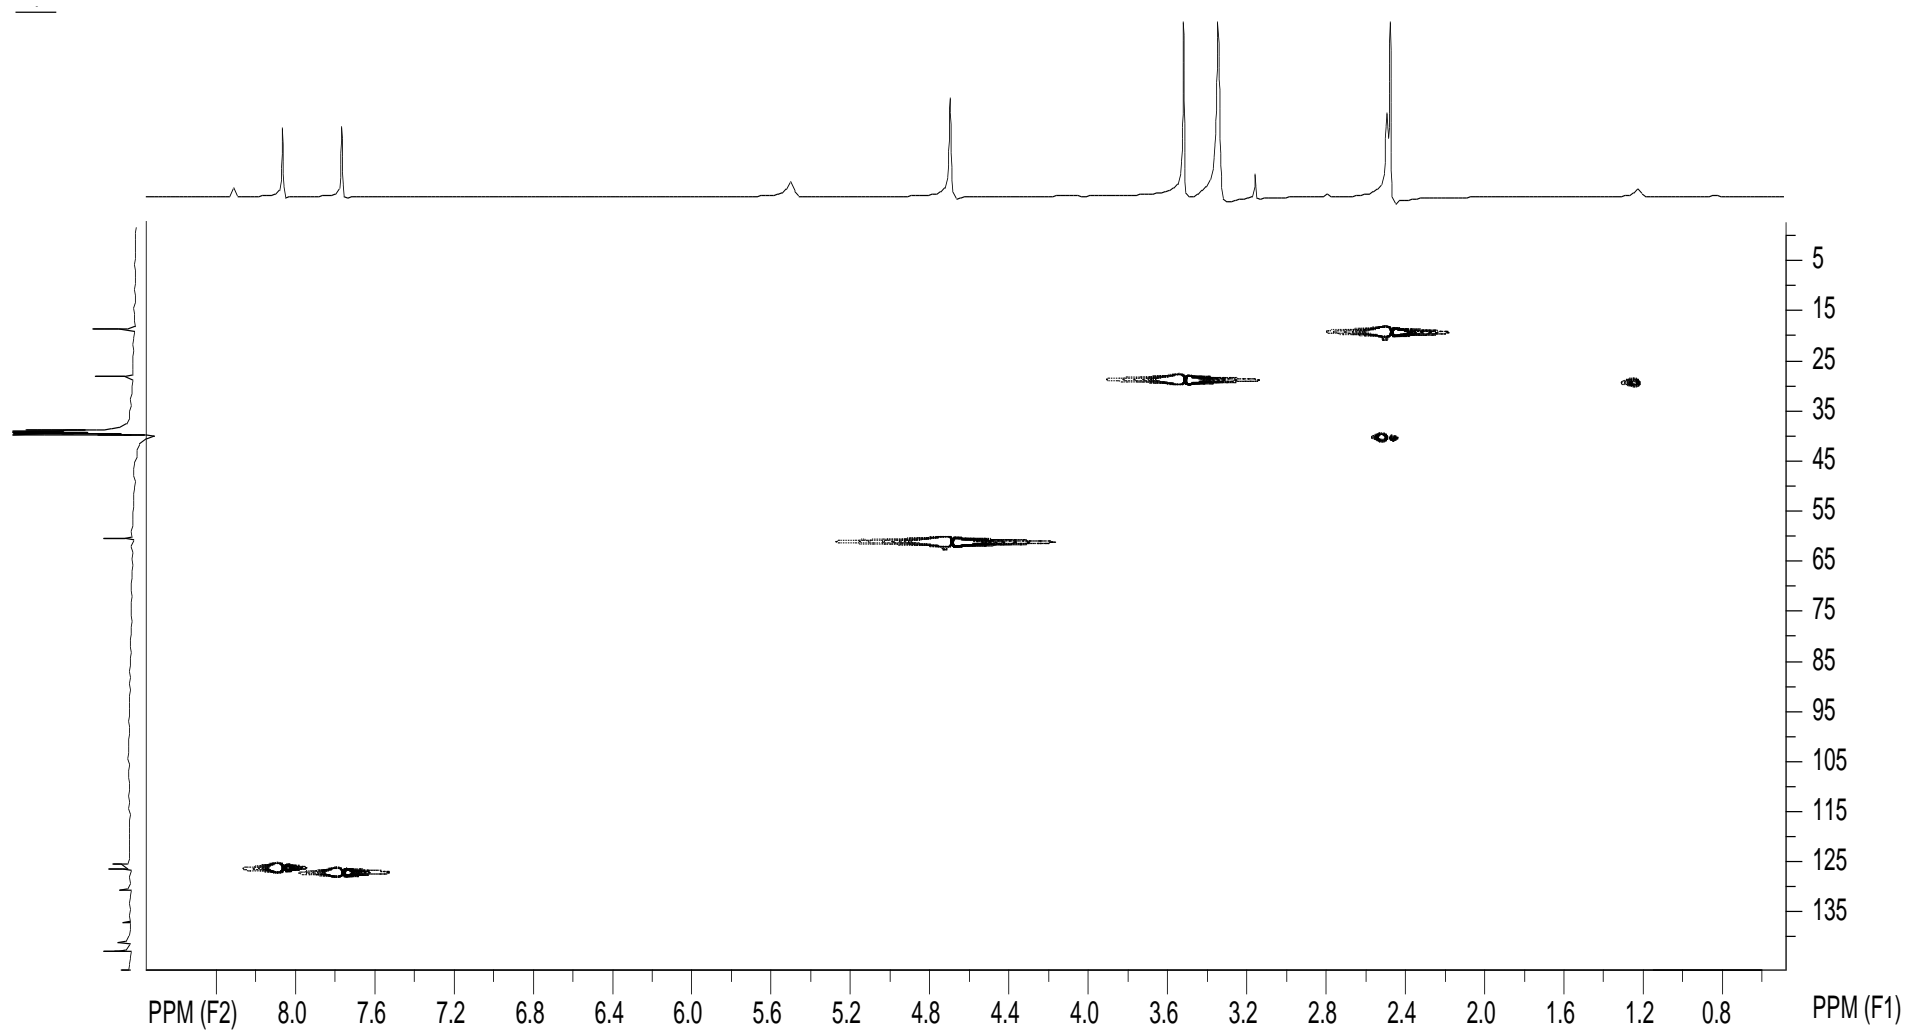

**Figura S14.** HMQC NMR spectrum of the new compound **2** in DMSO.



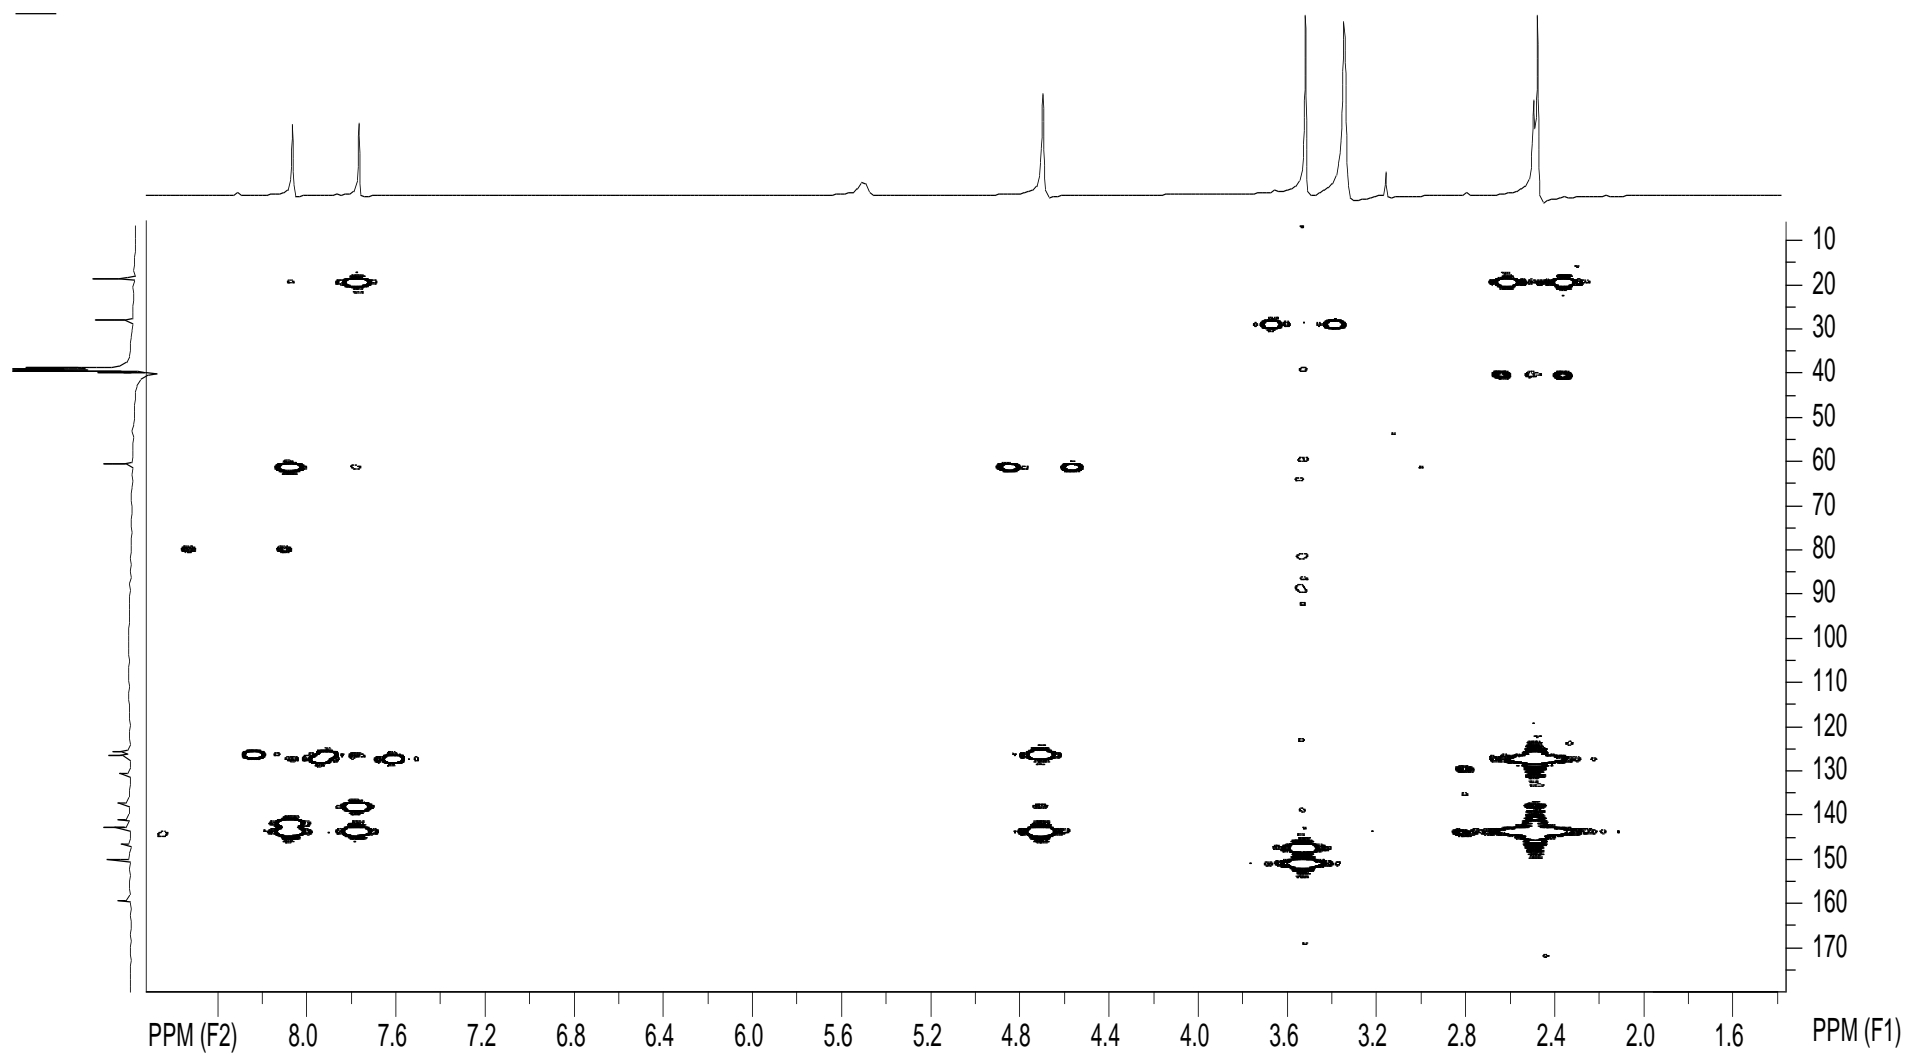

**Figura S15.** HMBC NMR spectrum of the new compound **2** in DMSO.

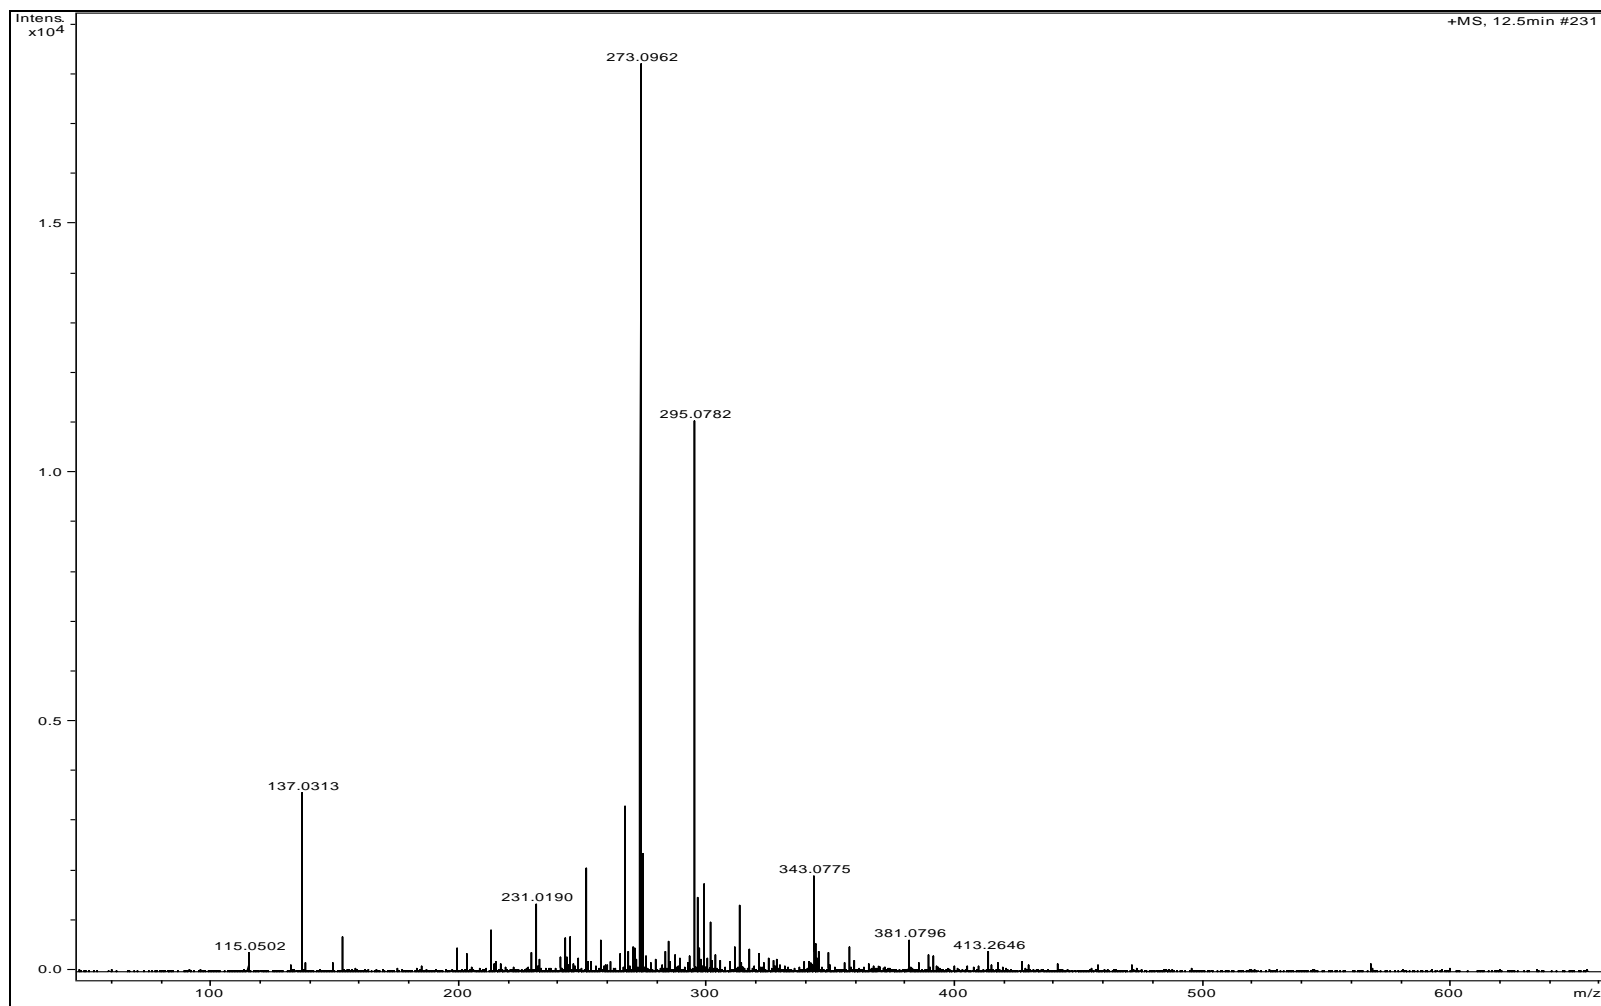

**Figure S16.** Mass spectra by HRMS of **2**.

**Spectral data of new compounds.**

*Pyridovericin-N-O-(4-O-methyl-β-D-glucopyranoside)* (1): pale yellow oil;  $[\alpha]_D^{25}$  -59.5 (c 0.02, MeOH); UV (MeOH)  $\lambda_{\max}$  (log  $\epsilon$ ) 200 (2.92), 205 (2.94), 247 (2.74), 342 (2.59) nm; IR (KBr)  $\nu_{\max}$  3360, 2875, 1672, 1569, 1320, 1034, 969  $\text{cm}^{-1}$ ;  $^1\text{H}$  NMR (500 MHz, DMSO- $d_6$ ):  $\delta$  9.55 (1H, s, OH-4'), 8.03 (1H, s, H-6), 7.88 (1H, d,  $J = 15.0$  Hz, H-8), 7.55 (1H, d,  $J = 15.0$  Hz, H-9), 7.28 (2H, d,  $J = 8.4$  Hz, H-2',6'), 6.78 (2H, d,  $J = 8.4$  Hz, H-3',5'), 5.98 (1H, d,  $J = 9.4$  Hz, H-11), 5.48 (1H, s, OH-2''), 5.33 (1H, d,  $J = 5.6$  Hz, OH-3''), 4.97 (1H, d,  $J = 8.0$  Hz, H-1''), 4.71 (1H, t,  $J = 5.6$  Hz, OH-6''), 4.59 (1H, t,  $J = 5.4$  Hz, OH-15), 3.57 (1H, m, H-6''), 3.48 (1H, m, H-6''), 3.41 (3H, s, H-4'' (-OCH<sub>3</sub>)), 3.38 (1H, m, H-3''), 3.35 (2H, m, H-15), 3.28 (1H, m, H-5''), 3.21 (1H, ddd,  $J = 4.4, 8.0, 9.1$  Hz, H-2''), 3.02 (1H, t,  $J = 9.1$  Hz, H-4''), 2.52 (1H, m, H-12), 1.85 (3H, s, H-16), 1.57 (1H, m, H-13), 1.21 (1H, m, H-13), 0.80 (3H, t,  $J = 7.4$  Hz, H-14) and  $^{13}\text{C}$  NMR (125 MHz, DMSO- $d_6$ ):  $\delta$  157.2 (C-2), 106.4 (C-3) 175.3 (C-4), 111.8 (C-5), 142.7 (C-6), 193.6 (C-7), 122.4 (C-8), 150.1 (C-9), 134.5 (C-10), 148.4 (C-11), 43.6 (C-12), 23.9 (C-13), 11.6 (C-14), 63.9 (C-15), 12.8 (C-16), 122.6 (C-1'), 130.4 (C-2',6'), 115.0 (C-3',5'), 157.0 (C-4'), 106.0 (C-1''), 72.3 (C-2''), 75.7 (C-3''), 78.7 (C-4''), 59.6 (C-4'', -OCH<sub>3</sub>), 75.7 (C-5''), 60.3 (C-6''); HRMS  $m/z$  562.2253  $[\text{M}+\text{H}]^+$  (calcd for C<sub>28</sub>H<sub>35</sub>NO<sub>11</sub> + H<sup>+</sup>, 562.2283).

*1-Methyl-11-hydroxylumichrome* (2): yellow powder; mp 321–322 °C; UV (MeOH)  $\lambda_{\max}$  (log  $\epsilon$ ) 200 (2.57), 244 (2.59), 251 (2.60), 339 (2.10), 420 (2.23) nm; IR (KBr)  $\nu_{\max}$  2931, 1722, 1425, 1375, 1267, 733  $\text{cm}^{-1}$ ;  $^1\text{H}$  NMR (500 MHz, DMSO- $d_6$ ):  $\delta$  11.96 (1H, s, NH-2), 8.07 (1H, s, H-6), 7.77 (1H, s, H-7), 5.51 (1H, s, OH-11), 4.70 (2H, s, H-11), 3.52 (3H, s, -NCH<sub>3</sub>-1) 2.48 (3H, s, H-12) and  $^{13}\text{C}$  NMR (125 MHz, DMSO- $d_6$ ):  $\delta$  28.2 (-NCH<sub>3</sub>-1), 150.2 (C-2), 159.6 (C-3), 130.7 (C-4a), 142.9 (C-5a), 125.7 (C-6), 141.2 (C-7), 143.0 (C-8), 126.6 (C-9), 137.4 (C-9a), 146.7 (C-10a), 60.6 (C-11), 18.7 (C-12); HRMS  $m/z$  273.0962  $[\text{M}+\text{H}]^+$  (calcd for C<sub>13</sub>H<sub>13</sub>N<sub>4</sub>O<sub>3</sub> + H<sup>+</sup>, 273.0982).

**Table S1.** NMR Spectroscopic data (500 MHz) for alkaloid **1**.

| position                   | pyridovericin- <i>N</i> - <i>O</i> -(4- <i>O</i> -methyl- $\beta$ -D-glucopyranoside)<br>( <b>1</b> ) <sup>a</sup> |                                  |                   |
|----------------------------|--------------------------------------------------------------------------------------------------------------------|----------------------------------|-------------------|
|                            | $\delta_C$ mult.                                                                                                   | $\delta_H$ ( <i>J</i> in Hz)     | HMBC <sup>b</sup> |
| 1                          | N-O                                                                                                                | -                                | -                 |
| 2                          | 157.2, C                                                                                                           | -                                | -                 |
| 3                          | 106.4, C                                                                                                           | -                                | -                 |
| 4                          | 175.4, C                                                                                                           | -                                | -                 |
| 5                          | 111.8, C                                                                                                           | -                                | -                 |
| 6                          | 142.7, CH                                                                                                          | 8.03, <i>s</i>                   | 4                 |
| 7                          | 193.7, C                                                                                                           | -                                | -                 |
| 8                          | 122.4, CH                                                                                                          | 7.88, <i>d</i> (15.0)            |                   |
| 9                          | 150.1, CH                                                                                                          | 7.55, <i>d</i> (15.0)            | 7                 |
| 10                         | 134.4, C                                                                                                           | -                                |                   |
| 11                         | 148.4, CH                                                                                                          | 5.98, <i>d</i> (9.4)             | 9, 12, 16         |
| 12                         | 43.6, CH                                                                                                           | 2.52, <i>m</i>                   | -                 |
| 13                         | 23.9, CH <sub>2</sub>                                                                                              | 1.21, <i>m</i> ; 1.57, <i>m</i>  | 11, 12, 14, 15    |
| 14                         | 11.6, CH <sub>3</sub>                                                                                              | 0.80, <i>t</i> (7.4)             | 12, 13            |
| 15                         | 63.9, CH <sub>2</sub>                                                                                              | 3.35, <i>m</i>                   | 11, 12, 13        |
|                            |                                                                                                                    | 4.59, <i>t</i> (5.4) (OH)        | 15                |
| 16                         | 12.8, CH <sub>3</sub>                                                                                              | 1.85, <i>s</i>                   | 9, 10, 11         |
| 1'                         | 122.6, C                                                                                                           | -                                | -                 |
| 2',6'                      | 130.3, C                                                                                                           | 7.28, <i>d</i> (8.4)             | 5, 2', 3', 4'     |
| 3',5'                      | 115.0, C                                                                                                           | 6.78, <i>d</i> (8.4)             | 1', 2', 3', 4'    |
| 4'-OH                      | 157.0, C                                                                                                           | 9.55, <i>s</i>                   | 3', 5'            |
| 1- <i>NO</i> -sugar        |                                                                                                                    |                                  |                   |
| 1''                        | 106.0, CH                                                                                                          | 4.97, <i>d</i> (8.0)             | 3''               |
| 2''                        | 72.3, CH                                                                                                           | 3.21, <i>ddd</i> (4.4, 8.0, 9.1) | 1''               |
|                            |                                                                                                                    | 5.48, <i>s</i> (OH)              |                   |
| 3''                        | 75.7, CH                                                                                                           | 3.38, <i>m</i>                   | 2'', 4''          |
|                            |                                                                                                                    | 5.33, <i>d</i> (5.6) (OH)        | 4''               |
| 4''                        | 78.7, CH                                                                                                           | 3.02, <i>t</i> (9.1)             | 5'', 6''          |
| 4- <i>OCH</i> <sub>3</sub> | 59.5, CH <sub>3</sub>                                                                                              | 3.41, <i>s</i>                   | 4''               |
| 5''                        | 75.6, CH                                                                                                           | 3.28, <i>m</i>                   | 6''               |
| 6''                        | 60.3, CH <sub>2</sub>                                                                                              | 3.48, <i>m</i> ; 3.57 <i>m</i>   | -                 |
|                            |                                                                                                                    | 4.71, <i>t</i> (5.6) (OH)        | 5'', 6''          |

<sup>a</sup>In DMSO-*d*<sub>6</sub>. <sup>b</sup>HMBC correlations are from hydrogen(s) stated to the indicated carbon.

**Table S2.** NMR Spectroscopic data (500 MHz) for compound **2**.

| position | 1-methyl-11-hydroxylumichrome ( <b>2</b> ) <sup>a</sup> |                              |                    |
|----------|---------------------------------------------------------|------------------------------|--------------------|
|          | $\delta_C$ mult.                                        | $\delta_H$ ( <i>J</i> in Hz) | HMBC <sup>b</sup>  |
| 1        | 28.2, N-CH <sub>3</sub>                                 | 3.52, s                      | 146.7, 150.2       |
| 2        | 150.2, C                                                | -                            | -                  |
| 3        | NH                                                      | 11.96, s                     | -                  |
| 4        | 159.6, C                                                | -                            | -                  |
| 4a       | 130.7, C                                                | -                            | -                  |
| 5        | N                                                       |                              |                    |
| 5a       | 142.9, C                                                | -                            | -                  |
| 6        | 125.7, CH                                               | 8.07, s                      | 60.6, 141.2, 143.0 |
| 7        | 141.2, C                                                | -                            | -                  |
| 8        | 143.0, C                                                | -                            | -                  |
| 9        | 126.6, CH                                               | 7.77, s                      | 18.7, 137.4, 143.0 |
| 9a       | 137.4, C                                                | -                            | -                  |
| 10       | N                                                       |                              |                    |
| 10a      | 146.7, C                                                | -                            | -                  |
| 11       | 60.6, CH <sub>2</sub>                                   | 4.70, s                      | 125.7, 143.0       |
| 11 – OH  |                                                         | 5.51, s                      |                    |
| 12       | 18.7, CH <sub>3</sub>                                   | 2.48, s                      | 126.6, 143.0       |

<sup>a</sup>In DMSO-*d*<sub>6</sub>. <sup>b</sup>HMBC correlations are from hydrogen(s) stated to the indicated carbon.

### Spectral data of known compounds

*Pretenellin B (3)*: yellow powder; mp 203–206 °C;  $[\alpha]_D^{25}$  -48.0 (*c* 0.02, MeOH); UV (MeOH)  $\lambda_{\max}$  (log  $\epsilon$ ) 201 (3.02), 226 (2.61), 246 (2.75), 336 (2.62) nm; IR (KBr)  $\nu_{\max}$  3403, 2963, 1661, 1611, 1578, 1325, 980.  $\text{cm}^{-1}$ ; <sup>1</sup>H NMR (500 MHz, DMSO-*d*<sub>6</sub>):  $\delta$  7.97 (1H, *d*, *J* = 15.0 Hz, H-8), 7.58 (1H, *d*, *J* = 15.0 Hz, H-9), 7.47 (1H, *s*, H-6), 7.28 (2H, *d*, *J* = 8.6 Hz, H-2',6'), 6.81 (2H, *d*, *J* = 8.6 Hz, H-3',5'), 5.85 (1H, *d*, *J* = 9.0 Hz, H-11), 2.56 (1H, *m*, H-12), 1.91 (3H, *s*, H-16), 1.46 (1H, *m*, H-13), 1.35 (1H, *m*, H-13), 1.03 (3H, *d*, *J* = 6.7 Hz, H-15), 0.88 (3H, *t*, *J* = 7.4 Hz, H-14) and <sup>13</sup>C NMR (125 MHz, DMSO-*d*<sub>6</sub>):  $\delta$  164.1 (C-2), 105.9 (C-3), 177.7 (C-4), 112.8 (C-5), 140.1 (C-6), 195.8 (C-7), 123.6 (C-8), 150.8 (C-9), 134.3 (C-10), 151.1 (C-11), 36.1 (C-12), 30.8 (C-13), 11.9 (C-14), 20.2 (C-15), 12.5 (C-16), 124.1 (C-1'),

131.0 (C-2',6'), 115.7 (C-3',5'), 156.7 (C-4'); HRMS  $m/z$  354.1702  $[M+H]^+$  (calcd for  $C_{21}H_{24}NO_4 + H^+$ , 354.1700).

*Pyridovericin (4)*: pale yellow powder; mp 201–204 °C;  $[\alpha]_D^{25}$  -15.0 ( $c$  0.3, MeOH); UV (MeOH)  $\lambda_{max}$  ( $\log \epsilon$ ) 215 (2.73), 245 (2.56), 340 (2.38) nm; IR (KBr)  $\nu_{max}$  3470, 3373, 3100, 1679, 1604, 1471 992  $cm^{-1}$ ;  $^1H$  NMR (500 MHz, DMSO- $d_6$ ):  $\delta$  11.60 (1H, *sl*, NH-1), 9.45 (1H, *s*, OH-4'), 7.98 (1H, *d*,  $J = 15.0$  Hz, H-8), 7.53 (1H, *s*, H-6), 7.52 (1H, *d*,  $J = 15.0$  Hz, H-9), 7.25 (2H, *d*,  $J = 8.3$  Hz, H-2',6'), 6.76 (2H, *d*,  $J = 8.3$  Hz, H-3',5'), 5.93 (1H, *d*,  $J = 10.0$  Hz, H-11), 4.57 (1H, *t*,  $J = 5.4$  Hz, OH-15), 3.35 (2H, *m*, H-15), 2.48 (1H, *m*, H-12), 1.88 (3H, *s*, H-16), 1.59 (1H, *m*, H-13), 1.20 (1H, *m*, H-13), 0.80 (3H, *t*,  $J = 7.7$  Hz, H-14) and  $^{13}C$  NMR (125 MHz, DMSO- $d_6$ ):  $\delta$  161.7 (C-2), 105.9 (C-3), 176.9 (C-4), 112.7 (C-5), 140.6 (C-6), 193.8 (C-7), 123.0 (C-8), 149.3 (C-9), 134.5 (C-10), 147.5 (C-11), 43.6 (C-12), 24.0 (C-13), 11.6 (C-14), 64.0 (C-15), 12.8 (C-16), 123.4 (C-1'), 130.1 (C-2',6'), 115.0 (C-3',5'), 156.7 (C-4'); HRMS  $m/z$  370.1646  $[M+H]^+$  (calcd for  $C_{21}H_{23}NO_5 + H^+$ , 370.1649).

*Lumichrome (5)*: yellow powder; mp 318–320 °C; UV (MeOH)  $\lambda_{max}$  ( $\log \epsilon$ ) 212 (2.17), 252 (2.54), 331 (2.55), 415 (2.21) nm; IR (KBr)  $\nu_{max}$  2920, 1710, 1432, 1390, 1280, 720  $cm^{-1}$ ;  $^1H$  NMR (500 MHz, DMSO- $d_6$ ):  $\delta$  11.80 (1H, *s*, NH-1) 11.60 (1H, *s*, NH-2), 7.91 (1H, *s*, H-6), 7.70 (1H, *s*, H-7), 2.49 (3H, *s*, H-11), 2.47 (3H, *s*, H-12) and  $^{13}C$  NMR (125 MHz, DMSO- $d_6$ ):  $\delta$  150.0 (C-2), 160.6 (C-3), 130.1 (C-4a), 138.9 (C-5a), 125.8 (C-6), 144.7 (C-7), 138.4 (C-8), 128.7 (C-9), 146.5 (C-9a), 141.7 (C-10a), 20.2 (C-11), 19.5 (C-12); HRMS  $m/z$  243.0863  $[M+H]^+$  (calcd for  $C_{12}H_{11}N_4O_2 + H^+$ , 243.0877).

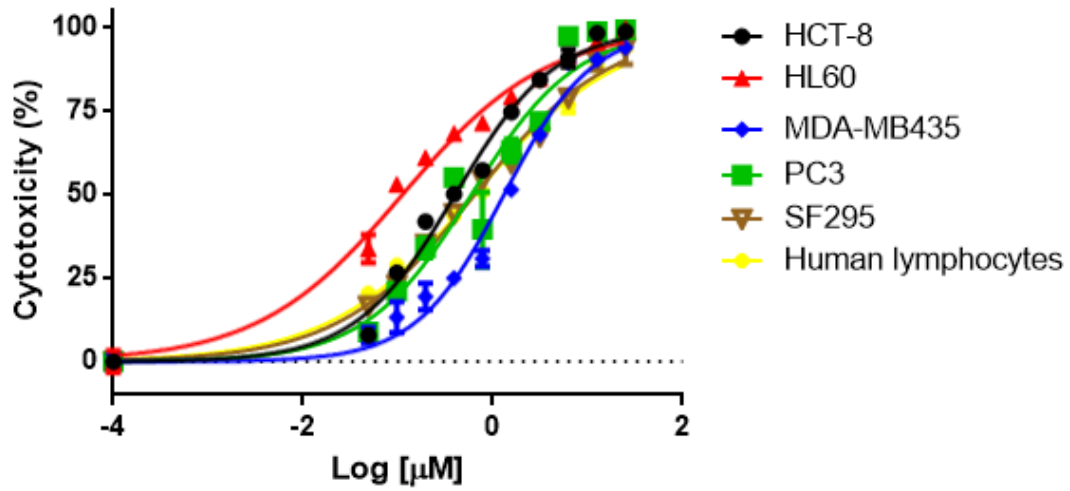

Doxorubicin (reference compound)

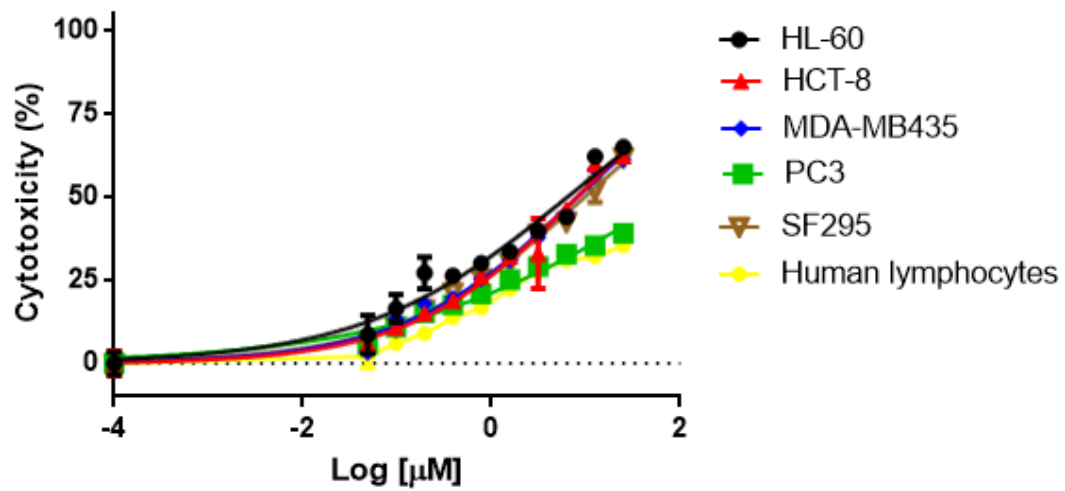

Pyridovericin (4)

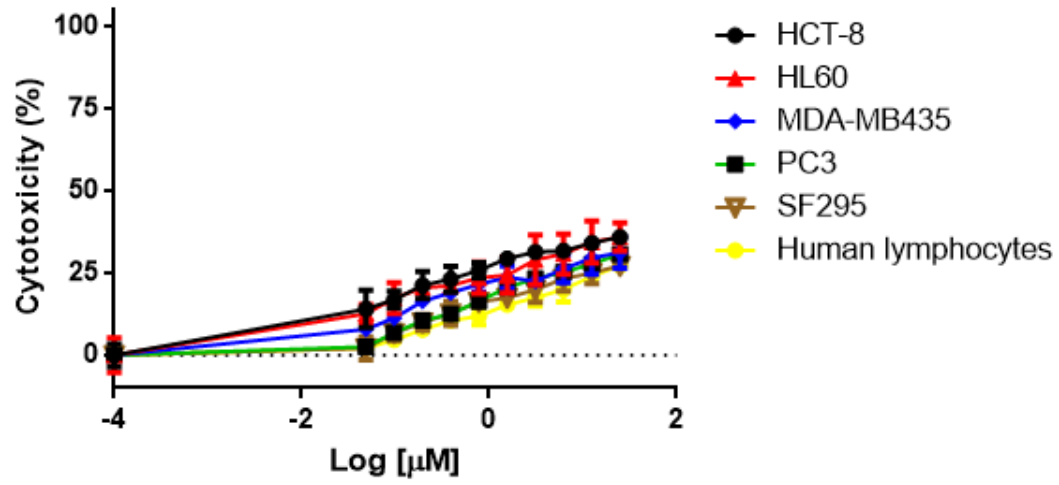

Pretenellin B (3)

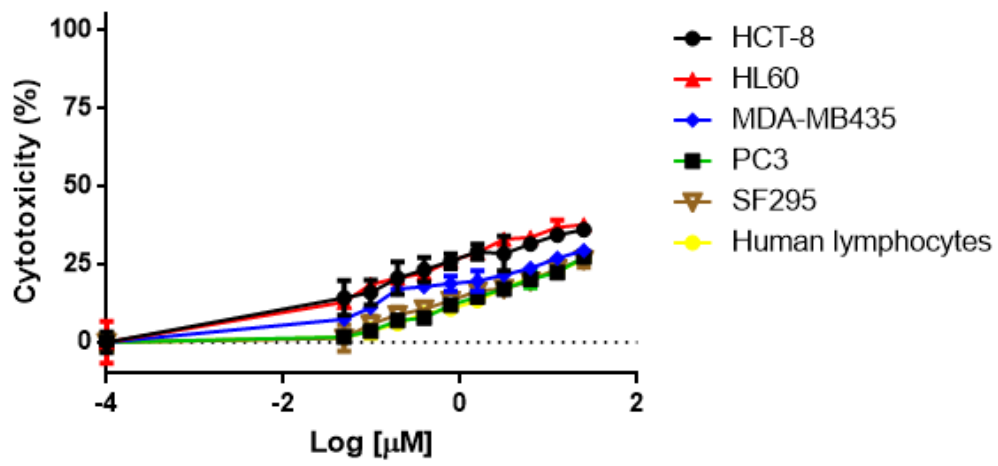

Lumichrome (5)



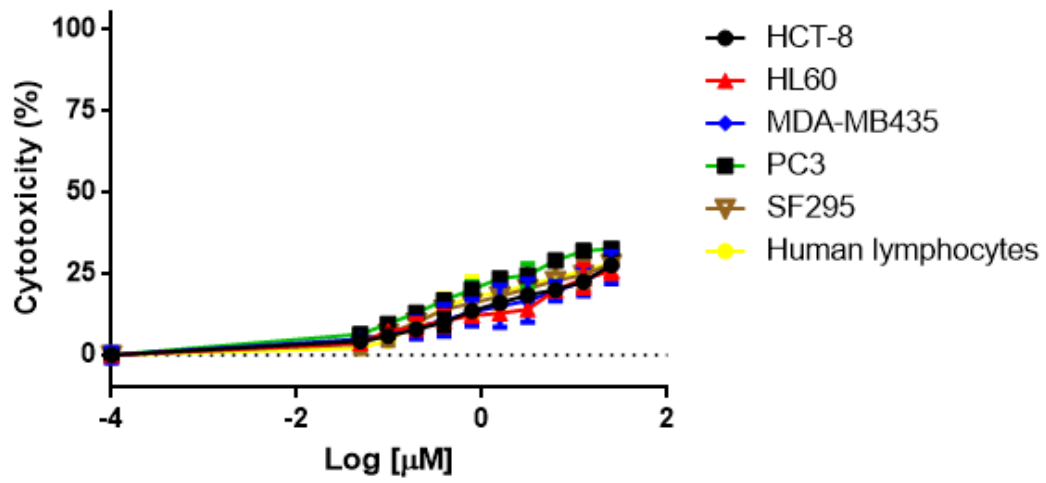

1-Methyl-11-hydroxylumichrome (2)

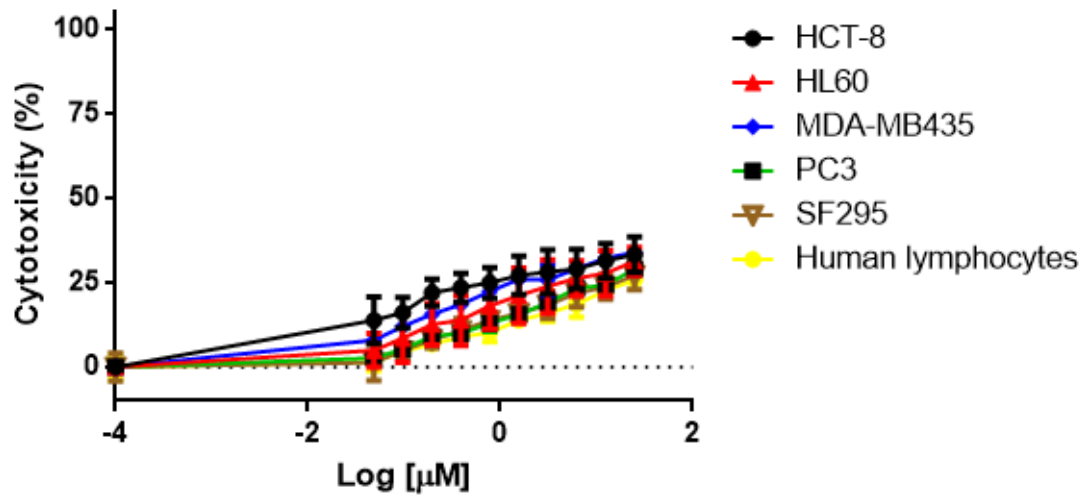

Pyridovericin-N-O-(4-O-methyl-β-D-glucopyranoside) (1)

**Figure S17.** Graphics of cytotoxicity assay.
